# Supplementary material
Source: PubMed Central journal article supplement (PMC4023831)
Supplement: MCB.00360-13_zmb999100318so1.pdf [file MCB.00360-13_zmb999100318so1.pdf]

## Methods

Behavioral tests and animal care were conducted in accordance with the standard ethical guidelines (European Communities Directive 86/609 EEC; National Institutes of Health 1995) and approved by the local ethical committee (CEEA-IMAS-UPF). All experiments were carried out under blind conditions.

### *Water maze*

Animals were habituated to environmental conditions for 15 days and handled by the experimenter daily 4 days before the initiation of the experimental procedures. During the experimental phase, mice were group housed (3-4 mice per cage) under a 12:12-h light-dark schedule (lights on at 0800) in controlled environmental conditions of humidity (60%) and temperature ( $22 \pm 2$  °C) with free access to food and water. Only males (6-8 months of age) were tested in this study. All behavioral testing was conducted by the same experimenters in an isolated room and at the same time of the day (08:30 to 15:30). The pool was situated in a 10 m<sup>2</sup> room with extra maze cues (doors, posters, cabinets, and electrical fixtures) visible from inside the pool (170 cm diameter, depth 60 cm; Panlab S.L., Barcelona). The swimming pool was filled with water ( $23 \pm 1$  °C) made opaque with non-toxic white painting (Abacus S.L., Barcelona) and a platform (15 cm diameter) was placed 1.5 cm below the water surface. Diffuse illumination was provided by indirect lighting from 40 W lamps aimed towards the ceiling. Behavioral experimenters were blind to the genotype of the animal.

Two different experimental paradigms were applied. One used general procedures described in detail elsewhere [1], except as noted below. The other was a repeated acquisition paradigm to separately assess working and reference memory. The experiments were performed in two subsequent phases using two separate groups of animals. Two pre-training sessions, in which animals learned the opportunity to escape (the platform) was used in both experiments. Once mice were familiarized with the set-up and acquired procedural learning in the pretraining sessions, the water maze task was performed. The visuo-spatial water maze protocol (Experiment I) consisted of five tasks (2 pre-training, 10 acquisition, 1 probe, 1 cue and 3 reversal sessions) [1,2]. Mice were tested for place learning acquisition in the water maze pool over 10 acquisition sessions (four trials per session; one session per day). The platform was placed in a fixed position in the center of the north-west quadrant and in each trial, mice were placed at one of the starting locations in random order [north, south, east, west (N, S, E, W), including permutations of the four starting points per session] of the swimming pool. Mice were allowed to swim until they located the submerged platform in a fixed position (NW quadrant, 22 cm away from the wall) or until 60 s had elapsed and were then placed on it for 20 s. In the probe session [four trials entering the pool from the four different starting points (N, S, E and W)] the platform was removed and mice were allowed to swim for 60 s without platform. The time spent in the trained and non-trained quadrants during 60 s were recorded. In the cued learning session [four trials entering the pool from the four different starting points (N, S, E and W)] the platform was elevated 1 cm above the water and its position was clearly indicated by a visible cue (black flag) and white curtains prevented the use of extra-maze cues. On the next day, mice performed the reversal learning session [four trials entering the pool from the four different starting points (N, S, E and W), three consecutive acquisition days]. In this test, the platform position was changed to the quadrant opposite to the previous location of the platform (SE). Mice unable to find the platform within 60 s were placed on it for 20 s.

Animals were tested in a repeated reversal learning paradigm (Experiment II) specifically designed to assess short and long-term memories [3,4]. It consisted of eight pairs of acquisition sessions, with the platform hidden, and from one daily session to the next, the platform was placed in a different location (E, SW, center and NW), each position being used once every four consecutive sessions. Each of the four starting positions (N, S, E, W) was used randomly in every daily session. Thus, mice randomly started from each of the four starting positions on the first (odd) trial of a pair and from the same starting position on the second (even) trial of the pair. The first trial of a pair was terminated when the mouse located the platform or when 60 s had elapsed; following a period of 20 s, in which the animal was allowed to stay on the platform. The second trial of a pair was run immediately. Several fixed extra maze cues were constantly visible from the pool. Acquisition and cued sessions consisted of four pairs of trials 30-45 min apart.

In both Experiment I and II, escape latencies, length of the swimming paths and swimming speed for each animal and trial were monitored and computed by a tracking system (SMART, Panlab S.A.) connected to a video camera placed above the pool. To better evaluate the spatial distribution of the behavior of the mice, the paths traveled in peripheral (15 cm wide) and central rings were measured in each trial and the Wishaw's index was calculated, corresponding to the percentage of path traveled within a straight corridor connecting the start and the goal.

Statistical analysis of water maze data was performed by using One-way ANOVA when significant ( $P < 0.05$ ) interaction between factors was found. Acquisition sessions were analysed also with Repeated Measures test (General Linear Model). The dependent variables analyzed in the water maze were escape latencies, length of swimming paths (in the center, periphery and total) and swimming speeds. Data are reported as mean  $\pm$  SEM. The statistical analysis was performed using the SPSS 12.0 software.

### *Active avoidance procedure and object recognition task*

Mice were initially housed five per cage in a temperature ( $21\pm 1^\circ\text{C}$ ) and humidity ( $65\pm 10\%$ ) controlled room with a 12-/12- h light/dark cycle (lights on from 08:00 to 20:00 hours) with ad libitum food and water. Experiments took place during the light phase. Mice were trained to avoid an aversive unconditioned stimulus (US), an electric shock (0.2 mA) continuously applied to the grid of the floor, associated with the presentation of a light (10 W) serving as a conditioned stimulus (CS) in a two-way shuttle box apparatus (Panlab, Barcelona). The apparatus consists of a box with two compartments ( $20\times 10$  cm) connected by a  $3\times 3$  cm door. The CS was switched on in the compartment in which the mouse was placed preceding 5 s the onset of the US and overlapping it for 25 s. Using this procedure, the light was presented in the compartment for 30 s (5 s alone and 25 s together with the US). At the end of the 30 s period, both CS and US were automatically turned off. A conditioned response was recorded when the animal avoided the US by changing from the compartment where the animal received the CS into the opposite compartment within the 5 s after the onset of the CS. If animals failed to avoid the shock, they could escape it by crossing during the US (25 s). Between each trial session, there was an intertrial interval of 30 s. The ratio of conditioned with respect to the total number of changes of compartment was also determined. Mice were placed in the shuttle box for 10 min before the start of each session to allow them to explore the box. After this habituation period, mice were subjected daily to 100-trial active avoidance sessions during 10 days.

The object recognition task was performed as reported previously [5] in a plexiglas open-field box (51 cm wide  $\times$  51 cm long  $\times$  58 cm high) with white vertical walls and a white floor divided into 25 equal squares. The light intensity in the middle of the field was 30 lux. The objects to be discriminated were a marble (5.5 cm high, object A) and a plastic (4.5 cm high, object B) figure. First, mice were individually habituated to the open-field for 50 min. The next day, they were submitted to a 10-min acquisition trial (first trial) during which they were placed in the open-field in the presence of object A. Locomotor activity (number of squares crossed), rearings and time that animal took to explore object A (animal's snout directed toward the object at a distance  $< 1$  cm) were recorded. A 10-min retention trial (second trial) occurred 1 h later. During this second trial, objects A and B were placed in the open-field, and locomotor activity, rearings and time that animal took to explore object A ( $t_A$ ) and object B ( $t_B$ ) were recorded. A recognition index was defined as  $[t_B/(t_A + t_B)] \times 100$ .

For the active avoidance paradigm, differences in the number of conditioned changes and in the ratio of conditioned versus total changes were analysed using Two-way ANOVA (day as within subjects factor, genotype as between subjects factor). For the object recognition task, number of squares crossed and rears were analysed using Two-way ANOVA (trial as within subjects factor, genotype as between subjects factor). Comparisons between genotypes were by One-way ANOVA and the Bonferroni post-test. In the object recognition task, recognition index of the different groups were compared using One-way ANOVA. Analyses were conducted using the statistical package SPSS 13.0. Differences were considered significant when the probability of error was less than 5%. Data are expressed as mean  $\pm$  SEM.

### *Electrophysiology in vitro*

Transgenic and wild type littermates were anaesthetised by intraperitoneal injection of a mixture of medetomidine (1 mg/kg) and ketamine (76 mg/kg), before being killed by cervical dislocation. The brains were rapidly removed and chilled ( $< 3^\circ\text{C}$ ), in oxygenated, ice-cold cutting solution composed of (in mM): 110 choline chloride, 2.5 KCl, 1.25  $\text{NaH}_2\text{PO}_4$ , 25  $\text{NaHCO}_3$ , 0.5  $\text{CaCl}_2$ , 7  $\text{MgCl}_2$ , 1.3 ascorbate, 3 pyruvate, and 7 dextrose. Parasagittal slices were cut from the dorsal hippocampus using a Vibroslice (Campden Instruments, Loughborough, UK). Slices were maintained in standard artificial cerebrospinal fluid (ACSF) consisting of (in mM): 125 NaCl, 26  $\text{NaHCO}_3$ , 3 KCl, 2  $\text{CaCl}_2$ , 1.0  $\text{MgCl}_2$ , 1.25  $\text{NaH}_2\text{PO}_4$ , and 10 glucose and gassed with 95%  $\text{O}_2$ -5%  $\text{CO}_2$  during the whole process. Extracellular experiments used 400  $\mu\text{m}$  thick slices prepared from 5-6 month old mice, and maintained in an interface chamber kept at  $33^\circ\text{C}$ , and micropipettes filled with ACSF (4-5  $\text{M}\Omega$ ). Granule cell responses were evoked with a bipolar Nichrome wire stimulating electrode placed in molecular layer 50-200  $\mu\text{m}$  from the recording site in granular layer. Single pulse stimuli were used to construct a stimulus response curve to identify the stimulus strength needed to evoke population spikes of half maximum amplitude, which were then used to perform a paired-pulse facilitation/inhibition experiment. Whole cell recordings used 300  $\mu\text{m}$  thick slices prepared from 1-2 month old mice and maintained submerged at  $31$ - $33^\circ\text{C}$ , under an Olympus BX-51 DIC microscope with water-immersion objectives, for patch-clamp recordings in whole-cell configuration under voltage clamp. Patch pipettes contained (in mM): cesium gluconate, 145; CsCl, 10; HEPES, 10; NaCl, 2; and EGTA, 0.1; pH = 7.25 (adjusted with CsOH). Granule cell bodies were selected for recording according to their size, location and appearance. A bipolar stimulating electrode was placed at perforant path 70-280  $\mu\text{m}$  from the granular cell layer. Constant current pulses were delivered to perform an input-output curve. Evoked IPSCs were measured as the integral of the membrane current response, which estimates charge transfer. Spontaneous IPSCs were identified and measured using MiniAnalysis software (Synaptosoft Inc).

## References

1. Morris R (1984) Developments of a water-maze procedure for studying spatial learning in the rat. *J Neurosci Methods* 11 (1):47-60. doi:0165-0270(84)90007-4 [pii]
2. Chen G, Chen KS, Knox J, Inglis J, Bernard A, Martin SJ, Justice A, McConlogue L, Games D, Freedman SB, Morris RG (2000) A learning deficit related to age and beta-amyloid plaques in a mouse model of Alzheimer's disease. *Nature* 408 (6815):975-979. doi:10.1038/35050103
3. van der Staay FJ, de Jonge M (1993) Effects of age on water escape behavior and on repeated acquisition in rats. *Behav Neural Biol* 60 (1):33-41
4. Escorihuela RM, Vallina IF, Martinez-Cue C, Baamonde C, Dierssen M, Tobena A, Florez J, Fernandez-Teruel A (1998) Impaired short- and long-term memory in Ts65Dn mice, a model for Down syndrome. *Neurosci Lett* 247 (2-3):171-174
5. Meziane H, Dodart JC, Mathis C, Little S, Clemens J, Paul SM, Ungerer A (1998) Memory-enhancing effects of secreted forms of the beta-amyloid precursor protein in normal and amnesic mice. *Proc Natl Acad Sci U S A* 95 (21):12683-12688

**Figure S1**

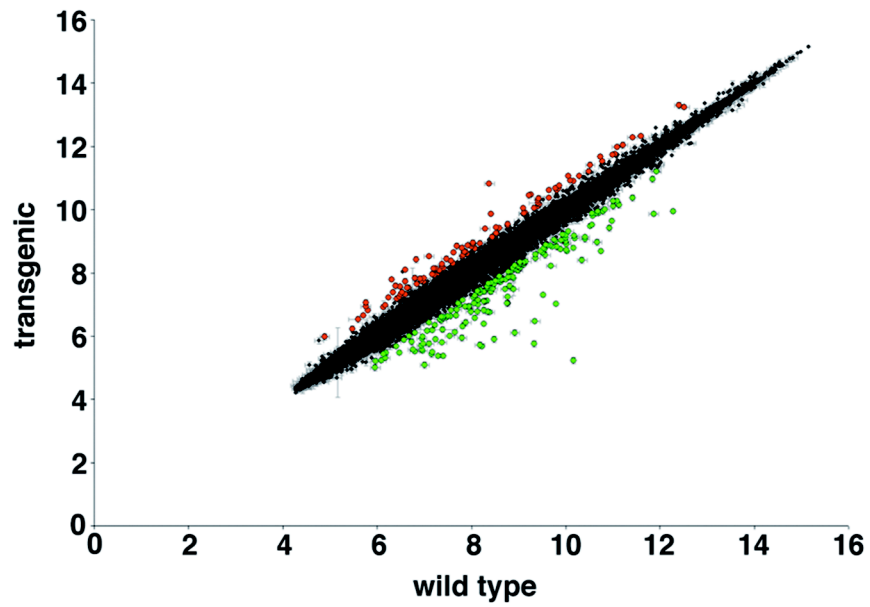

**Statistical values and scatter plot of all probes contained in the genome-wide analysis.** Spots with  $|\text{Fold Change}| > 1.6$  and  $\text{FDR} < 0.1$  are highlighted in green (repressed genes) and red (induced genes).

Figure S2

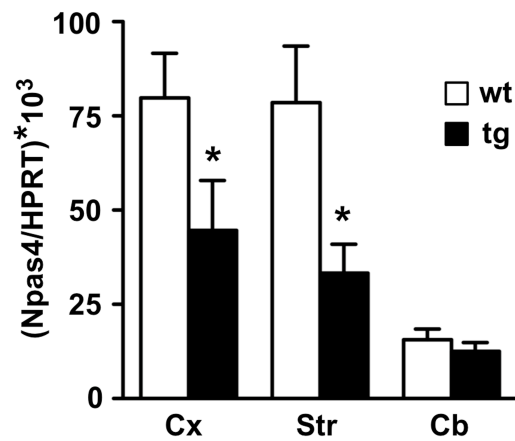

**Real-time qPCR analysis of Npas4.** Expression levels of Npas4 mRNA in cerebral cortex (Cx), striatum (Str) and cerebellum (Cb) from wild type (wt) and transgenic (tg) mice. Values are normalized with respect to HPRT mRNA content. Results are the mean  $\pm$  SEM of 8-12 mice in two separate experiments \* $P < 0.05$  (two-tailed, unpaired  $t$ -test).

## Figure S3

### A Npas4

CTCCCTCTCCCGTTTCGACGTCA<sup>CGGGA</sup>FGACGTC  
GGAAGTCTGGGAGGGAGGAGGAGCACCCCCCT  
CCCCAGC<sup>CAGT</sup>GGCTCCCTCTGCAGCTTGCTTTA  
GCCCAGCCTCCCGCCTCCCGCTGCCCCCCCCGT  
CTCTAAAAACGAGCCCCCACGCCTGTCA<sup>GGAGC</sup>  
TATATA<sup>GGCGGATCGAGGCAGGGCAGGGGGGC</sup>  
AGCGCTGCCGAGCGGAGCCCAGGAGTGGAGCG  
AGAGCGAGCAAGAGCCTGAGCGAAAAGACCGGG  
AAGCAAGGAAGAGGAAGCCTCCGGTGCATCGGG  
AAAGGATCGCAGGTGCTCGGGAGCCGGAGCTGG  
AGCTCCACAGCCGGCA<sup>GTCATG</sup>TACCGATCCACC

### B c-fos

GTTGAAAGCCTGGGGCGTAGAGT<sup>TGAC</sup>GACAGAGC  
GCCCCGAGAGGGCCTTGGGGCGCGCTTCCCCCCCC  
TTCCAGTTCCGCCAG<sup>TGAC</sup>GTAGGAAGTCCATCCAT  
TCACAGCGCTTC<sup>TATAAA</sup>GGCGCCAGCTGAGGCGCC  
TACTACTCCAACCGCG<sup>ACTG</sup>CAGCGAGCA<sup>ACTG</sup>AGA  
AG<sup>ACTG</sup>GATAGAGCCGGCGTTCCGCGAACGAGCA  
G<sup>TGAC</sup>CGCGCTCCCACCCAGCTCTGCTCTGCAGCTC  
CCACCAGTGTCTACCCCTGGACCCCTTGCCTGGCTT  
TCCCCAACTTCGACC<sup>ATGATG</sup>TTCTCGGGTTTCAAC  
GCCGACTACGAGGC<sup>GTCAT</sup>TCTCCCGCTGCAGTAGC

### C BDNF exon IV

CGTGCACTAGAGTGTCTATTTTCGAGGCAGAGGAGGT  
ATCATATGACAGCTCAC<sup>GTCAT</sup>AGGCAGCGTGGAGCC  
CTCTCGTGGACTCCCACCCACTTCCCATTACCGAG  
GAGAGGACTGCTCTCGCTGCCGCTCCCCCACCCAC  
CCCCGGCGAGCTAGCATGAAATCTCCCAGCCTCTGC  
CTAGATCAAATGGAGCTTCTCGCTGAAGGCGTGCGA  
GTATTACCTCCGCCATGCAATTTCCACTATCAATAATT  
AACTTCTTTGCTGCAGAACAGGAGTACATATCGGCCA  
CCAAAGACTCGCCCCCTCCCCCTTTAACTGAAGAGA  
AGGGGAAATATATAGTAAGAGTCTAGAACCTTGGGGA  
CCGGTCTTCCCAGAGCAGCTGCCTTGATGTTACTT  
<sup>TGAC</sup>AAAGTAG<sup>TGAC</sup>TGAAAAAG

### D DREAM

ACTGGAGGTT<sup>GTCAT</sup>GGATGGAGGCGAAGGAGGGG  
GGAGATAAGAGGGGGAGGGAAGAGGCAGAGGAAG  
AGAGGTGGAGCTAAGACTCGGAAGGAAGGGAGGGT  
GGAAGGAGTGGGCAGGGGGCGGGAGAGAAACCTC  
CAG<sup>TGAC</sup>AATTGCGTCTGGGTCCAAGCAAACATGAG  
GCAGCTGCCAGCCGGACCAAGCAGTCTGGCTTGCT  
CGGGCTGCAAAGCGGGAAGATTAG<sup>TGAC</sup>GGTCCCT  
TTCAGCAGCAGAG<sup>ATG</sup>CAGAGGACCAAGGTAGGCG  
CTG

**Nucleotide sequence of mouse promoters. (A) Npas4, (B) c-fos, (C) BDNF exon IV and (D) DREAM gene regulatory regions. The TATA box (blue), the translation start site (green) and the location of putative DRE sites (red) are indicated.**

**Figure S4**

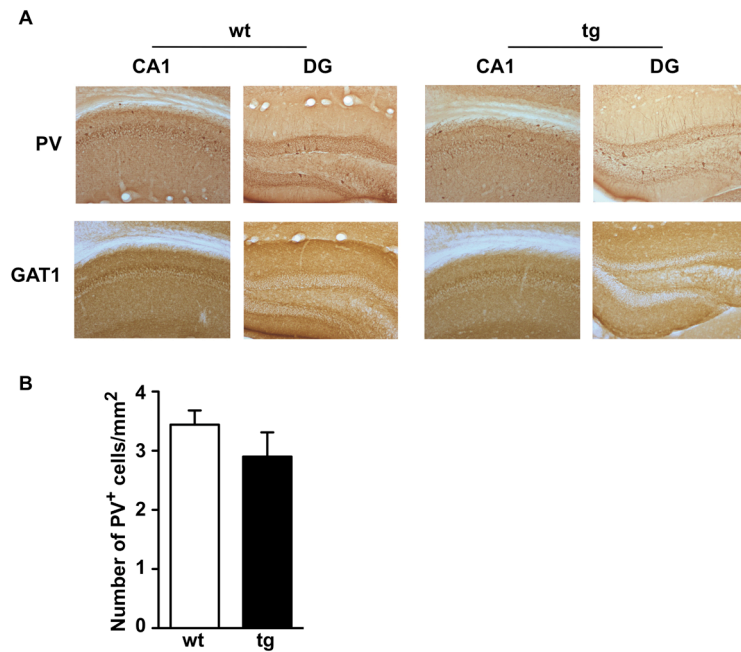

**Total GABAergic cellularity is not modified in transgenic hippocampus. (A)** Coronal sections from wild type (wt) and transgenic (tg) hippocampus showing immunostained parvalbumin (PV) positive cells and total GAT1 immunoreactivity in CA1 and dentate gyrus (DG). Bar represents 100  $\mu$ m. **(B)** Quantification of parvalbumin positive cells in wild type and transgenic hippocampus.

Figure S5

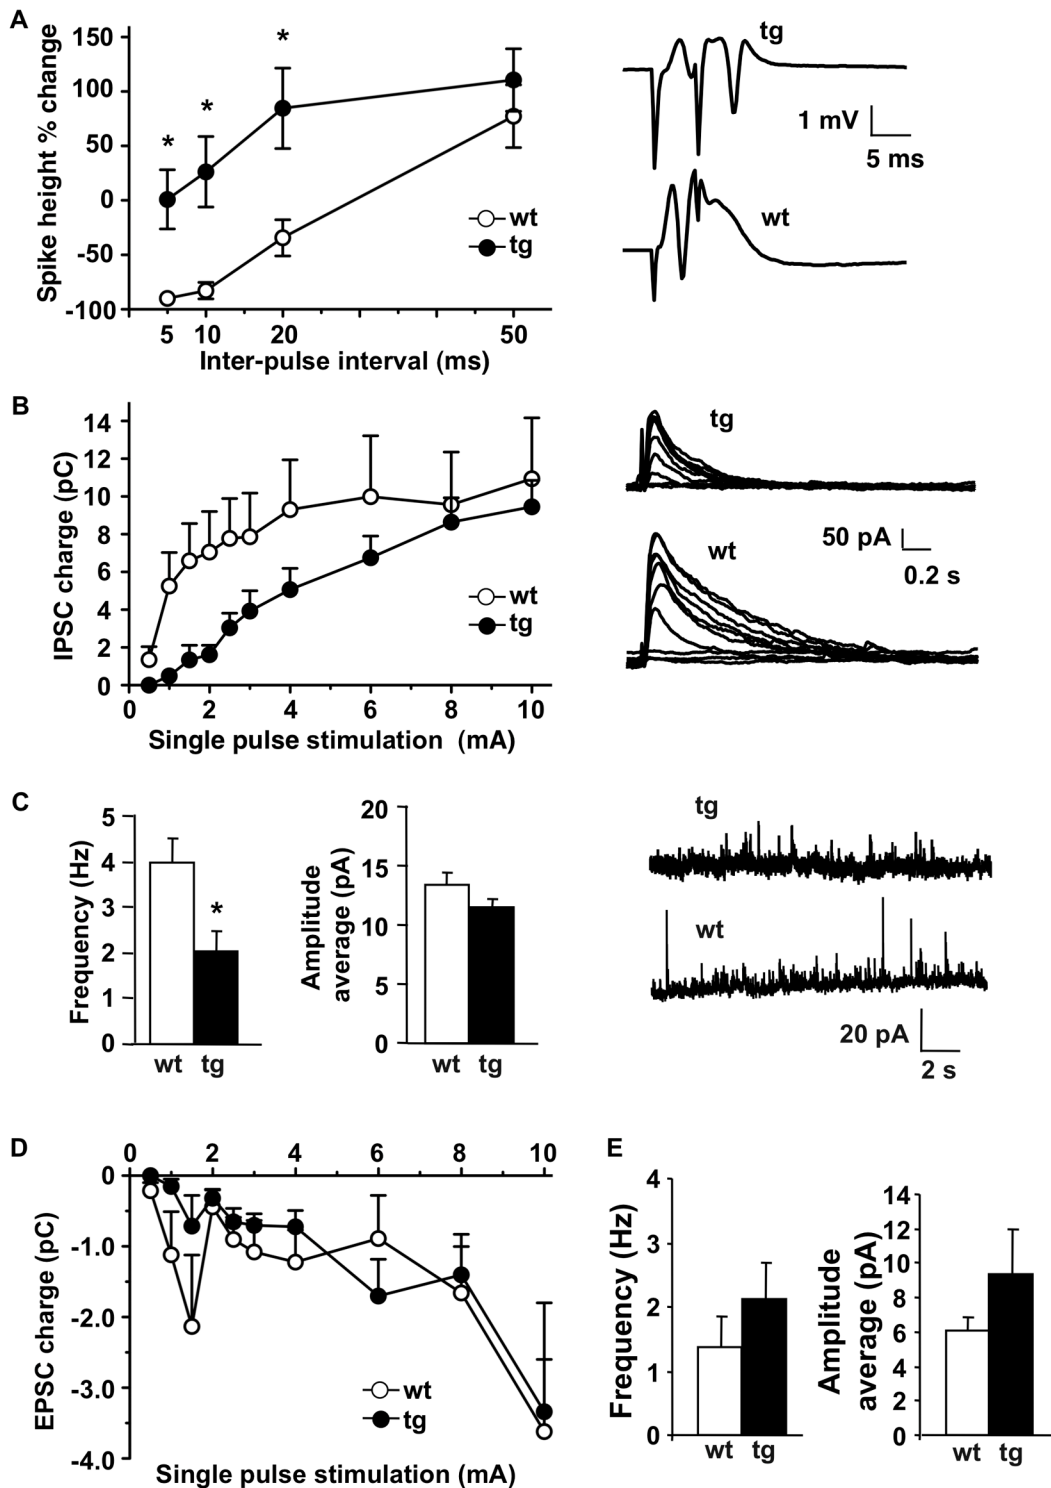

**In vitro depressed inhibition in dentate gyrus of transgenic mice.** (A) Effect of the interval between paired stimuli on the difference in population spike amplitude as percentage of the first response. The stimulus intensity required for half-maximal population spike with single stimuli was not different between genotypes (wt  $8.2 \pm 1.4$  V, tg  $10.9 \pm 1.6$  V). Paired evoked responses at 5 ms inter-stimulus interval shows



inhibition in wt (n=13) and facilitation in tg (n=17) mice (Two-way ANOVA with Bonferroni post-test, \*  $P < 0.05$ ). At right are original traces of population spikes in pyramidal cells at 5 ms inter-pulse interval showing the inhibition and facilitation in wt and tg mice, respectively. **(B)** Inhibitory postsynaptic currents (IPSCs) evoked by single pulse stimulation at 0 mV holding potential in whole-cell recordings. Charge transferred during IPSC as a function of stimulus strength shows decreased inhibitory current in tg mice (n=13) compared to wt (n=26). Mean IPSC area difference is significant at the 0.05 level (Univariate ANOVA with Bonferroni post-test). At right are superimposed IPSCs evoked by stimuli in the range 0.5 to 10 mA. **(C)** Frequency and average amplitude of spontaneous IPSCs in wt (n = 12) and tg (n = 10) mice recorded at 0 mV (Mann-Whitney Rank Test, \*  $P < 0.05$ ). At right are representative traces of spontaneous IPSCs. **(D)** Excitatory postsynaptic currents (EPSCs) evoked by single pulse stimulation at -80 mV holding potential in whole-cell recordings. Charge transferred during EPSC as a function of stimulus strength shows no difference (Univariate ANOVA) in excitatory currents between genotypes (wt n=26, tg n=14). **(E)** Frequency and average amplitude of spontaneous EPSCs recorded at -80 mV shows no difference (Mann-Whitney Rank Test) between genotypes (wt n = 10, tg n = 11). Vertical error bars represent SEM.

Figure S6

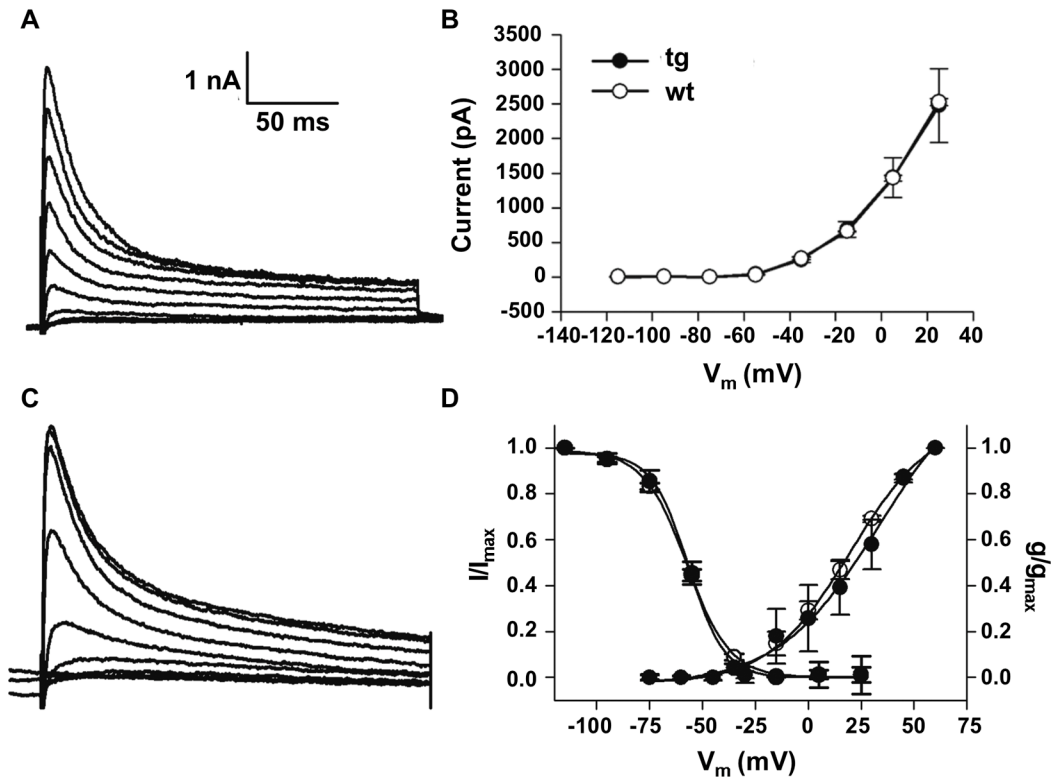

**A-type current is not altered in daDREAM mice.** (A) A-current recorded in hippocampal neurons in wild type mice. (B) Pooled data showing that peak amplitude of A-type current at different voltage steps is similar in wild-type (wt) and transgenic (tg) mice. (C) Typical traces showing the steady-state inactivation of A-type current in wild type mice. Currents were recorded during membrane potential held to 30 mV following a 400 ms conditioning pulse from -115 mV to +25 mV with 20 mV steps. (D) Steady-state activation and inactivation curves in transgenic and wild type mice. The data were fitted with Boltzmann function. Steady-state activation is plotted as voltage steps versus  $g/g_{max}$ , while the steady-state inactivation is plotted as voltage steps versus  $I/I_{max}$ .

Figure S7

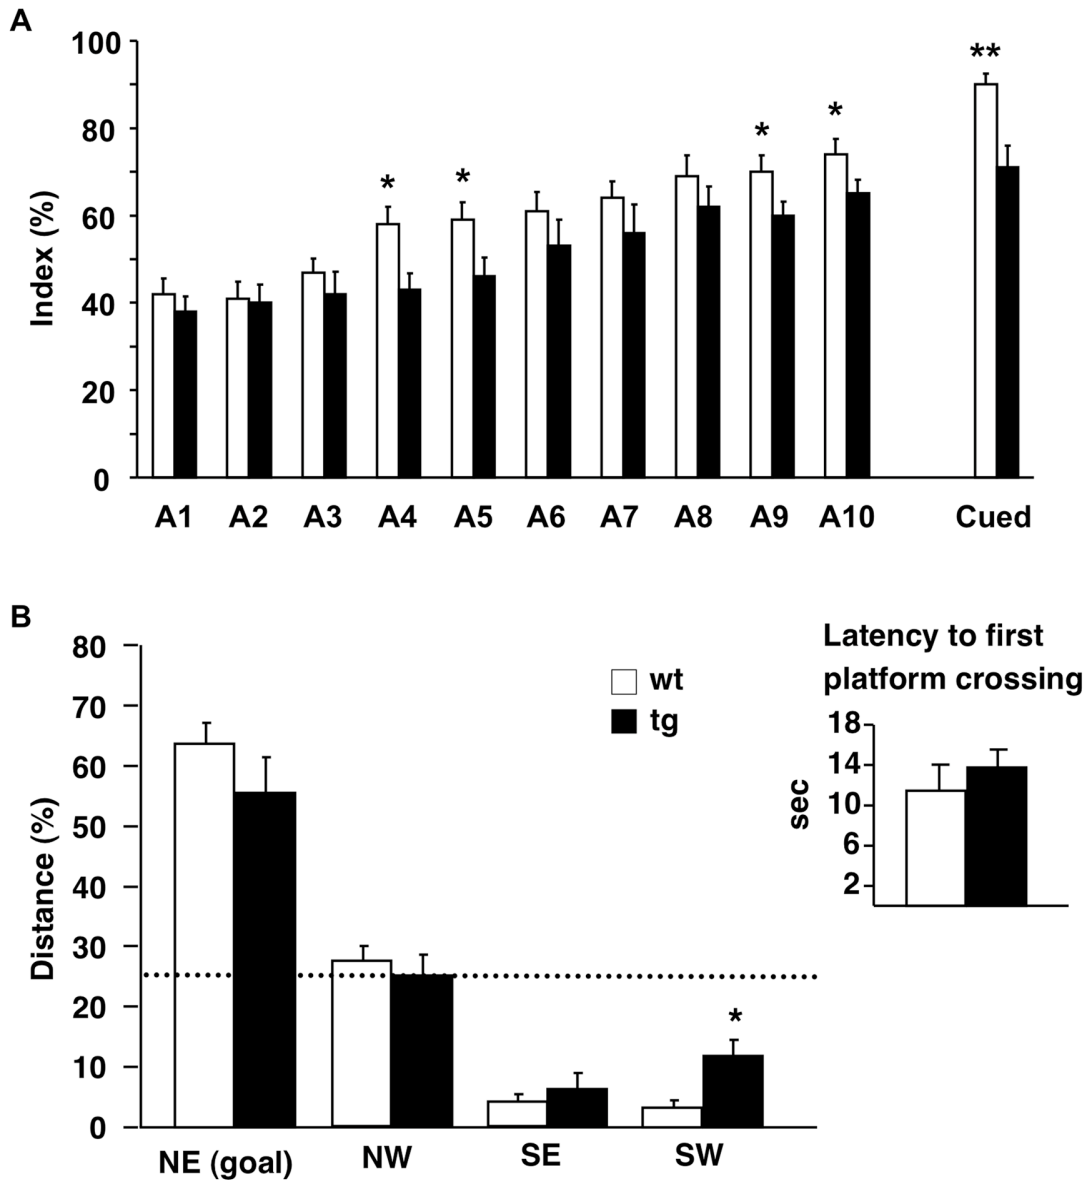

**Impaired Wishaw index in the water maze in daDREAM mice.** (A) Wishaw index, defined as % path inside the optimal corridor to reach the platform, indicates the use of less efficient learning strategies in transgenic (tg) than in wild type (wt) littermates across acquisition sessions (Repeated measures ANOVA  $F_{(1,19)} = 10.314$ ,  $P = 0.003$ ). \* $P < 0.05$ ; \*\* $P < 0.01$ . (B) No differences in permanence time in trained quadrant (NE) or the first platform cross latency (inset) were observed between transgenic and wild type mice in the removal session, which assesses reference memory through mice preference for the previously trained quadrant. Data are expressed as mean  $\pm$  SEM.

Figure S8

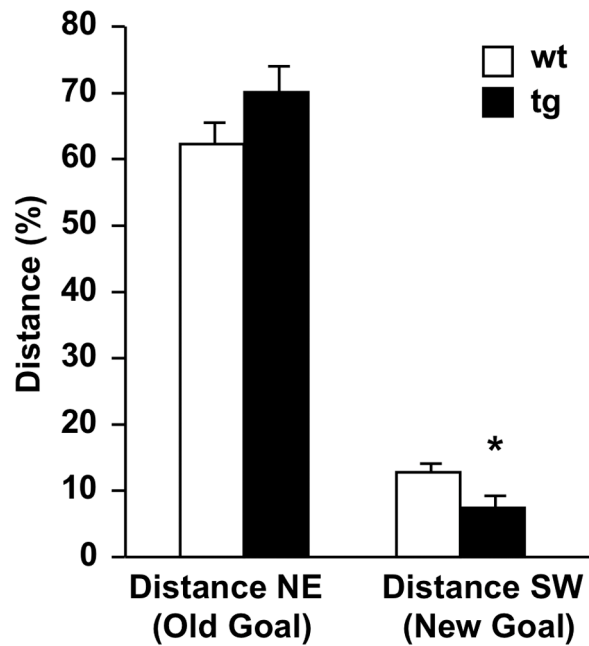

**Impaired performance in the reversal session of the water maze in daDREAM mice.** In the reversal-learning test, the platform was hidden in the opposite quadrant to the trained one. Transgenic (tg) mice showed a non-significant trend to search more the platform in the old-goal quadrant and spent less time in the new-goal quadrant than wild type (wt) mice (One-way ANOVA  $F_{(1,19)} = 5.610$ ,  $P = 0.029$ ). Data are expressed as mean  $\pm$  SEM. \* $P < 0.05$ .

Figure S9

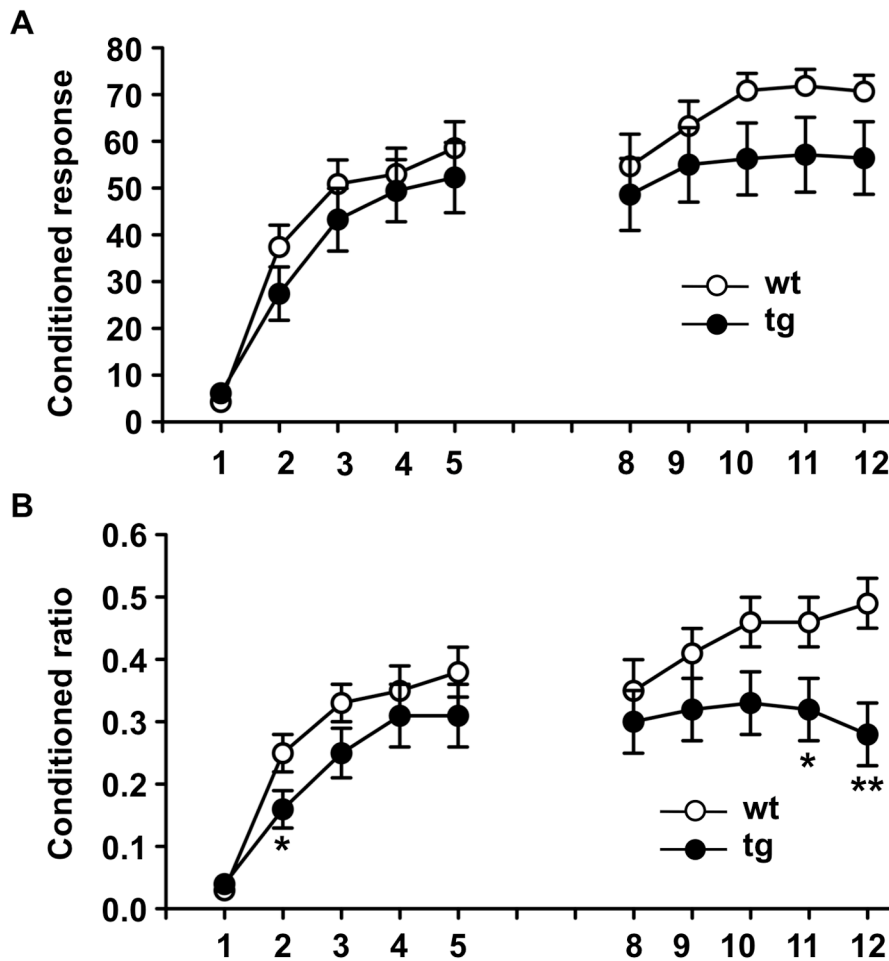

**Reduced learning in the active avoidance procedure.** (A) Repeated measures ANOVA for conditioned changes revealed no significant main effect in transgenic (tg) mice. (B) Repeated measures ANOVA for the ratio of conditioned changes, with respect to the total number of changes of compartment, revealed a significant main effect of day of training ( $F_{(9,288)} = 45.851, P < 0.001$ ), genotype ( $F_{(2,32)} = 4.633, P < 0.05$ ) and interaction between these two factors ( $F_{(18,288)} = 2.545, P < 0.01$ ). Post-hoc comparisons following significant one-way ANOVA for each day of training showed that tg mice significantly decreased the ratio of conditioned changes with respect to wild type (wt) mice on day 2 and on the last two sessions. Data are shown as mean  $\pm$  SEM in 100 trial sessions during 12 days (wt,  $n = 15$ ; tg,  $n = 11$ ). \*  $P < 0.05$ , \*\* $P < 0.01$  (Bonferroni post-test).

**Table S1** Sequences of primers and probes used for real-time quantitative PCR

| transcript       | primer | 5'-3' sequence               | MGB probe 5'-3' sequence      |
|------------------|--------|------------------------------|-------------------------------|
| DREAM            | 5'     | cacctatgcacacttctcttca       | FAM-tgccttcgatgctgat          |
|                  | 3'     | accacaaaagtcctcaaagtggat     |                               |
| daDREAM          | 5'     | cacctatgcacacttctcttca       | VIC-cgcctttgctgcggc           |
|                  | 3'     | accacaaaagtcctcaaagtggat     |                               |
| GABAR $\alpha$ 2 | 5'     | aagacaaaattgagcacatgcaa      | FAM-caagcagcagagaccata        |
|                  | 3'     | tgggtcccacaccagaaga          |                               |
| BDNF             | 5'     | cgagtgggtcacagcggcaga        | none <sup>a</sup>             |
|                  | 3'     | cgaacatacgattgggtagtt        |                               |
| GABAR $\beta$ 2  | 5'     | ccattctctctgggtctcctt        | none                          |
|                  | 3'     | tgattgtggtcattgttaggacagt    |                               |
| GABAR $\beta$ 3  | 5'     | ccttctggatcaattacgatgca      | none                          |
|                  | 3'     | tgagtgttgatggttgcacatggt     |                               |
| PSD95            | 5'     | gtttggatcctgtgtccctcat       | none                          |
|                  | 3'     | ggtaatcgcggccgtctat          |                               |
| $\beta$ -actin   | 5'     | gtcatcactattggcaacgag        | FAM-tccatcatgaagtgtgacgttgaca |
|                  | 3'     | gacctctatgccaacacagt         |                               |
| HPRT             | 5'     | tggatacaggccagactttgt        | FAM-ttgaattccagacaagttt       |
|                  | 3'     | ctgaagtactcattatagtcagggcata |                               |

<sup>a</sup>SYBR Green based qPCR

**Table S2** Assays from Applied Biosystems used for real-time quantitative PCR

| Transcript       | Assay ID       |
|------------------|----------------|
| Npas4            | Mm00463644_m1  |
| Nr4a1            | Mm011300401_m1 |
| c-Fos            | Mm00487425_m1  |
| Mef2c            | Mm01340839_m1  |
| Per3             | Mm00478120_m1  |
| JunB             | Mm00492781_m1  |
| Sox11            | Mm01281943_s1  |
| Egr2             | Mm00456650_m1  |
| Mbd4             | Mm01184338_m1  |
| GABAR $\alpha$ 1 | Mm01299033_m1  |
| GAT1             | Mm00618601_m1  |
| VIAAT            | Mm00494138_m1  |
| GAD2             | Mm00484623_m1  |
| KChIP1           | Mm01189526_m1  |
| KChIP2           | Mm00518914_m1  |
| KChIP4           | Mm00518835_m1  |
| CREB             | Mm01342452-m1  |

**Table S3** Sequences of primers used for semiquantitative PCR

| Transcript   | primer | 5'- 3' sequence        |
|--------------|--------|------------------------|
| Npas4        | 5'     | cctctcccgttcgacgtcac   |
|              | 3'     | ggcagcagctccttgaggttc  |
| c-fos        | 5'     | ctacacgcggaaggctaggag  |
|              | 3'     | cagtcgcggttgagtagtagg  |
| BDNF exon IV | 5'     | aatgcgcggaattctgattctg |
|              | 3'     | ggggagggggcgagtcttt    |
| DREAM        | 5'     | tgagaggccaggactaggagca |
|              | 3'     | agcgcctaccttggtcctctg  |



**Table S4** Genes whose expression levels are modified in transgenic compared to wild type hippocampus. Clustering according to Gene Ontology (Biological process)

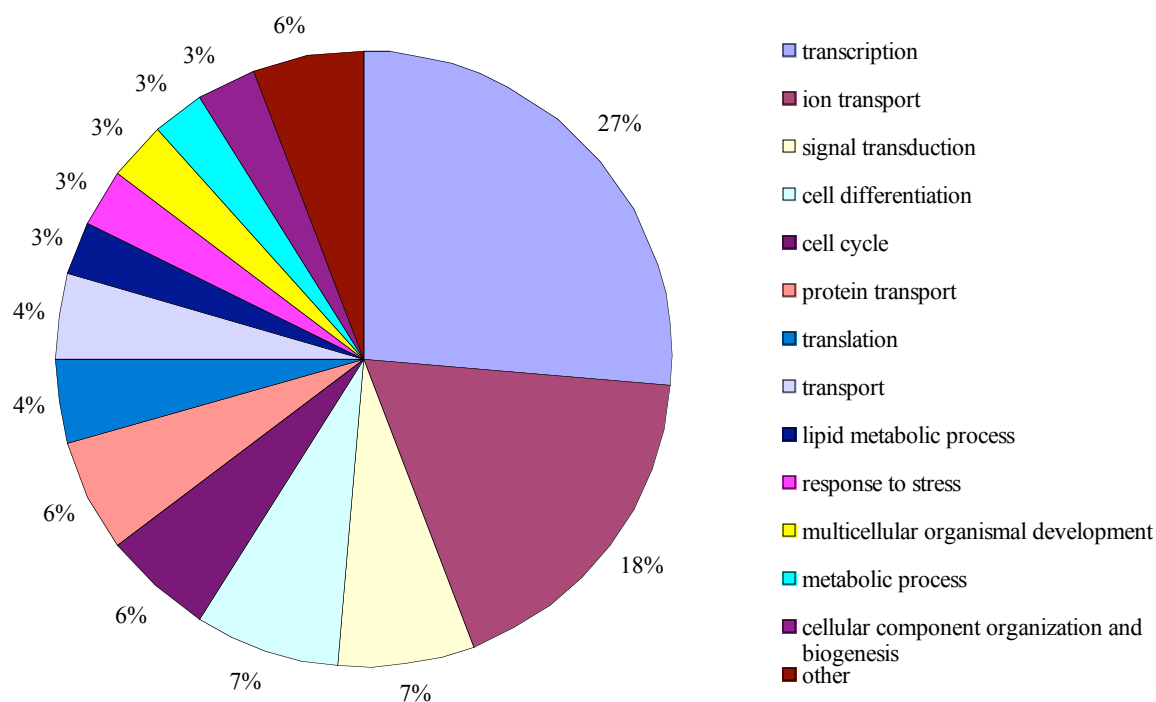

| Probe Set ID                   | Gen Symbol | Gene Name                                                                                         | Change |
|--------------------------------|------------|---------------------------------------------------------------------------------------------------|--------|
| <b>Category: transcription</b> |            |                                                                                                   |        |
| 1415899_at                     | Junb       | Jun-B oncogene                                                                                    | DOWN   |
| 1416250_at<br>1448272_at       | Btg2       | B-cell translocation gene 2, anti-proliferative                                                   | DOWN   |
| 1416505_at                     | Nr4a1      | nuclear receptor subfamily 4, group A, member 1                                                   | DOWN   |
| 1418174_at<br>1438211_s_at     | Dbp        | D site albumin promoter binding protein                                                           | DOWN   |
| 1419380_at                     | Zfp423     | zinc finger protein 423                                                                           | DOWN   |
| 1421028_a_at<br>1451507_at     | Mef2c      | myocyte enhancer factor 2C                                                                        | DOWN   |
| 1421087_at                     | Per3       | period homolog 3 (Drosophila)                                                                     | DOWN   |
| 1421163_a_at                   | Nfia       | nuclear factor I/A                                                                                | DOWN   |
| 1427682_a_at                   | Egr2       | early growth response 2                                                                           | DOWN   |
| 1439998_at                     | Jmjd1c     | jumonji domain containing 1C                                                                      | DOWN   |
| 1441573_at                     | Scmh1      | Sex comb on midleg homolog 1                                                                      | DOWN   |
| 1443020_at                     | Hmbox1     | homeobox containing 1                                                                             | DOWN   |
| 1449578_at                     | Supt16h    | suppressor of Ty 16 homolog (S. cerevisiae)                                                       | DOWN   |
| 1455246_at                     | Smarcc1    | SWI/SNF related, matrix associated, actin dependent regulator of chromatin, subfamily c, member 1 | DOWN   |
| 1459250_at                     | Tshz2      | teashirt zinc finger family member 2                                                              | DOWN   |

|                                                        |                            |                                                                                                                                                                         |      |
|--------------------------------------------------------|----------------------------|-------------------------------------------------------------------------------------------------------------------------------------------------------------------------|------|
| 1459372_at                                             | Npas4                      | neuronal PAS domain protein 4                                                                                                                                           | DOWN |
| 1429951_at                                             | Ssbp2                      | single-stranded DNA binding protein 2                                                                                                                                   | UP   |
| 1448406_at                                             | Eid1                       | EP300 interacting inhibitor of differentiation 1                                                                                                                        | UP   |
| <b>Category: ion transport</b>                         |                            |                                                                                                                                                                         |      |
| 1421738_at                                             | Gabra2 ///<br>LOC100047443 | gamma-aminobutyric acid (GABA-A) receptor, subunit alpha 2 /// similar to Gamma-aminobutyric-acid receptor subunit alpha-2 precursor (GABA(A) receptor subunit alpha-2) | DOWN |
| 1430485_at                                             | Trpc2                      | transient receptor potential cation channel, subfamily C, member 2                                                                                                      | DOWN |
| 1436239_at                                             | Slc5a5                     | solute carrier family 5 (sodium iodide symporter), member 5                                                                                                             | DOWN |
| 1439987_at                                             | Grik1                      | glutamate receptor, ionotropic, kainate 1                                                                                                                               | DOWN |
| 1443865_at<br>1455444_at                               | Gabra2                     | gamma-aminobutyric acid (GABA-A) receptor, subunit alpha 2                                                                                                              | DOWN |
| 1449421_a_at                                           | Kcne2                      | potassium voltage-gated channel, Isk-related subfamily, gene 2                                                                                                          | DOWN |
| 1450712_at                                             | Kcnj9                      | potassium inwardly-rectifying channel, subfamily J, member 9                                                                                                            | DOWN |
| 1455136_at                                             | Atp1a2                     | ATPase, Na <sup>+</sup> /K <sup>+</sup> transporting, alpha 2 polypeptide                                                                                               | DOWN |
| 1436994_a_at                                           | Hist1h1c                   | histone cluster 1, H1c                                                                                                                                                  | UP   |
| 1440397_at                                             | Cacna2d1                   | calcium channel, voltage-dependent, alpha2/delta subunit 1                                                                                                              | UP   |
| 1442742_at                                             | Atp2c1                     | ATPase, Ca <sup>++</sup> -sequestering                                                                                                                                  | UP   |
| 1456923_at                                             | Trpm3                      | transient receptor potential cation channel, subfamily M, member 3                                                                                                      | UP   |
| <b>Category: signal transduction</b>                   |                            |                                                                                                                                                                         |      |
| 1417432_a_at<br>1454696_at                             | Gnb1                       | guanine nucleotide binding protein (G protein), beta 1                                                                                                                  | DOWN |
| 1421385_a_at                                           | Myo7a                      | myosin VIIa                                                                                                                                                             | DOWN |
| 1439843_at<br>1441974_at                               | Camk4                      | calcium/calmodulin-dependent protein kinase IV                                                                                                                          | DOWN |
| 1440801_s_at                                           | Adrbk2                     | adrenergic receptor kinase, beta 2                                                                                                                                      | DOWN |
| 1454770_at                                             | Cckbr                      | cholecystokinin B receptor                                                                                                                                              | DOWN |
| <b>Category: cell differentiation</b>                  |                            |                                                                                                                                                                         |      |
| 1416953_at                                             | Ctgf                       | connective tissue growth factor                                                                                                                                         | DOWN |
| 1423477_at                                             | LOC100044533<br>/// Zic1   | similar to Zic protein /// zinc finger protein of the cerebellum 1                                                                                                      | UP   |
| 1437904_at                                             | Rbm45                      | RNA binding motif protein 45                                                                                                                                            | UP   |
| 1438936_s_at<br>1438937_x_at                           | Ang                        | angiogenin, ribonuclease, RNase A family, 5                                                                                                                             | UP   |
| 1439627_at                                             | Zic1                       | zinc finger protein of the cerebellum 1                                                                                                                                 | UP   |
| <b>Category: cell cycle</b>                            |                            |                                                                                                                                                                         |      |
| 1448229_s_at                                           | Ccnd2                      | cyclin D2                                                                                                                                                               | DOWN |
| 1448830_at                                             | Dusp1                      | dual specificity phosphatase 1                                                                                                                                          | DOWN |
| 1430811_a_at                                           | Nuf2                       | NUF2, NDC80 kinetochore complex component, homolog (S. cerevisiae)                                                                                                      | UP   |
| 1437579_at                                             | Nek2                       | NIMA (never in mitosis gene a)-related expressed kinase 2                                                                                                               | UP   |
| <b>Category: protein transport</b>                     |                            |                                                                                                                                                                         |      |
| 1444037_at                                             | Lman1                      | lectin, mannose-binding, 1                                                                                                                                              | DOWN |
| 1449859_at                                             | Golt1b                     | golgi transport 1 homolog B (S. cerevisiae)                                                                                                                             | DOWN |
| 1418898_at<br>1423322_at<br>1449262_s_at<br>1450937_at | Lin7c                      | lin-7 homolog C (C. elegans)                                                                                                                                            | UP   |

|                                                                 |                                                         |                                                                                                                     |      |
|-----------------------------------------------------------------|---------------------------------------------------------|---------------------------------------------------------------------------------------------------------------------|------|
| 1457969_at                                                      | Rabif                                                   | RAB interacting factor                                                                                              | UP   |
| <b>Category: translation</b>                                    |                                                         |                                                                                                                     |      |
| 1455600_at                                                      | Rps3                                                    | ribosomal protein S3                                                                                                | DOWN |
| 1431006_at                                                      | Mrpl3                                                   | mitochondrial ribosomal protein L3                                                                                  | UP   |
| 1434624_x_at                                                    | Rps9                                                    | ribosomal protein S9                                                                                                | UP   |
| <b>Category: transport</b>                                      |                                                         |                                                                                                                     |      |
| 1456187_at                                                      | Slc7a14                                                 | solute carrier family 7 (cationic amino acid transporter, y+ system), member 14                                     | DOWN |
| 1458203_at                                                      | Spire1                                                  | Spire homolog 1 (Drosophila)                                                                                        | DOWN |
| 1450779_at                                                      | Fabp7                                                   | fatty acid binding protein 7, brain                                                                                 | UP   |
| <b>Category: lipid metabolic process</b>                        |                                                         |                                                                                                                     |      |
| 1443904_at                                                      | Fads6                                                   | fatty acid desaturase domain family, member 6                                                                       | DOWN |
| 1415904_at<br>1431056_a_at                                      | Lpl                                                     | lipoprotein lipase                                                                                                  | UP   |
| <b>Category: response to stress</b>                             |                                                         |                                                                                                                     |      |
| 1429463_at                                                      | Prkaa2                                                  | protein kinase, AMP-activated, alpha 2 catalytic subunit                                                            | DOWN |
| 1431182_at                                                      | EG666031 ///<br>Hspa8 ///<br>LOC624853 ///<br>LOC641192 | predicted gene, EG666031 /// heat shock protein 8 /// hypothetical<br>LOC624853 /// similar to heat shock protein 8 | DOWN |
| <b>Category: multicellular organismal development</b>           |                                                         |                                                                                                                     |      |
| 1418687_at                                                      | Arc                                                     | activity regulated cytoskeletal-associated protein                                                                  | DOWN |
| 1419308_at                                                      | Invs                                                    | inversin                                                                                                            | DOWN |
| <b>Category: metabolic process</b>                              |                                                         |                                                                                                                     |      |
| 1424877_a_at                                                    | Alad ///<br>LOC100046072                                | aminolevulinate, delta-, dehydratase /// similar to aminolevulinate, delta-,<br>dehydratase                         | DOWN |
| 1439740_s_at                                                    | Uck2                                                    | uridine-cytidine kinase 2                                                                                           | UP   |
| <b>Category: cellular component organization and biogenesis</b> |                                                         |                                                                                                                     |      |
| 1435551_at                                                      | Fhod3                                                   | formin homology 2 domain containing 3                                                                               | DOWN |
| 1439397_at                                                      | Fmn1                                                    | formin 1                                                                                                            | DOWN |
| <b>Category: other</b>                                          |                                                         |                                                                                                                     |      |
| 1417765_a_at                                                    | Amy1                                                    | amylase 1, salivary                                                                                                 | DOWN |
| 1424105_a_at<br>1438390_s_at                                    | Pttg1                                                   | pituitary tumor-transforming 1                                                                                      | DOWN |
| 1417461_at<br>1417462_at                                        | Cap1                                                    | CAP, adenylate cyclase-associated protein 1 (yeast)                                                                 | UP   |
| 1417638_at                                                      | Lefty1                                                  | left right determination factor 1                                                                                   | UP   |

**Table S5** Genes whose expression levels are modified in transgenic compared to wild type hippocampus. Clustering according to Gene Ontology (Cellular Component)

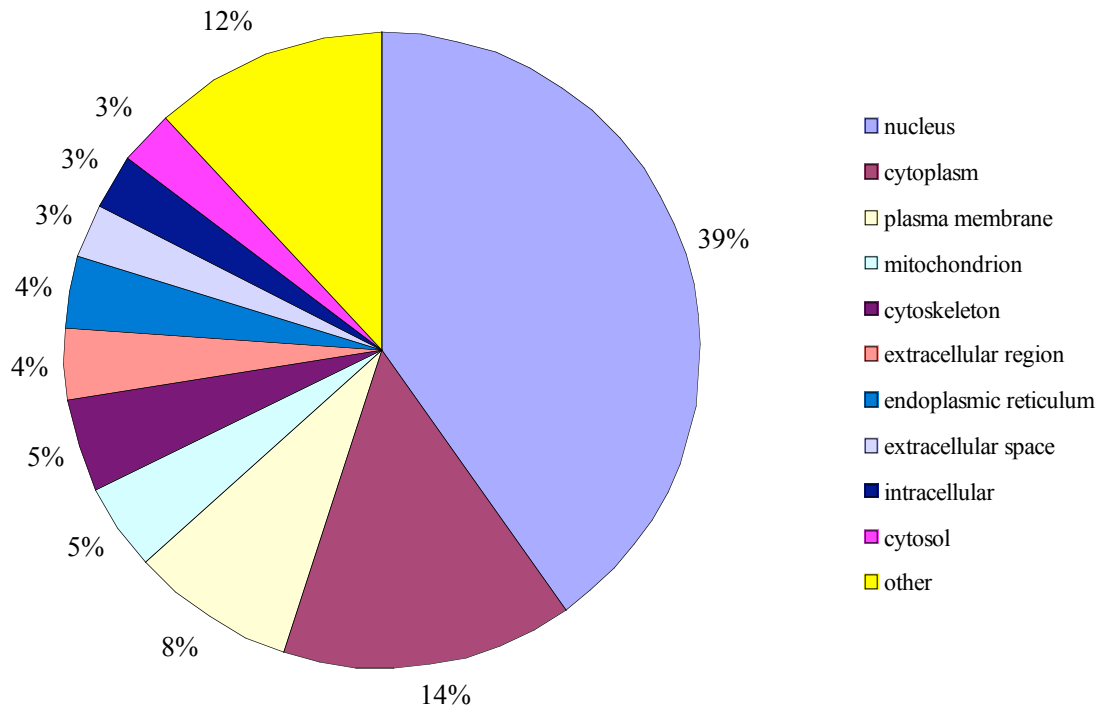

| Probe Set ID                 | Gen Symbol | Gene Name                                                | Change |
|------------------------------|------------|----------------------------------------------------------|--------|
| <b>Category: nucleus</b>     |            |                                                          |        |
| 1415899_at                   | Junb       | Jun-B oncogene                                           | DOWN   |
| 1416200_at                   | Il33       | interleukin 33                                           | DOWN   |
| 1416505_at                   | Nr4a1      | nuclear receptor subfamily 4, group A, member 1          | DOWN   |
| 1418174_at<br>1438211_s_at   | Dbp        | D site albumin promoter binding protein                  | DOWN   |
| 1419308_at                   | Invs       | inversin                                                 | DOWN   |
| 1419380_at                   | Zfp423     | zinc finger protein 423                                  | DOWN   |
| 1421028_a_at<br>1451507_at   | Mef2c      | myocyte enhancer factor 2C                               | DOWN   |
| 1421087_at                   | Per3       | period homolog 3 (Drosophila)                            | DOWN   |
| 1421163_a_at                 | Nfia       | nuclear factor I/A                                       | DOWN   |
| 1422659_at<br>1427763_a_at   | Camk2d     | calcium/calmodulin-dependent protein kinase II, delta    | DOWN   |
| 1423100_at                   | Fos        | FBJ osteosarcoma oncogene                                | DOWN   |
| 1424105_a_at<br>1438390_s_at | Pttg1      | pituitary tumor-transforming 1                           | DOWN   |
| 1427682_a_at                 | Egr2       | early growth response 2                                  | DOWN   |
| 1429463_at                   | Prkaa2     | protein kinase, AMP-activated, alpha 2 catalytic subunit | DOWN   |
| 1431708_a_at                 | Tia1       | cytotoxic granule-associated RNA binding protein 1       | DOWN   |

|                            |                                                      |                                                                                                                     |      |
|----------------------------|------------------------------------------------------|---------------------------------------------------------------------------------------------------------------------|------|
| 1437537_at                 | Casp9                                                | caspase 9                                                                                                           | DOWN |
| 1439397_at                 | Fmn1                                                 | formin 1                                                                                                            | DOWN |
| 1439843_at<br>1441974_at   | Camk4                                                | calcium/calmodulin-dependent protein kinase IV                                                                      | DOWN |
| 1439998_at                 | Jmjd1c                                               | jumonji domain containing 1C                                                                                        | DOWN |
| 1440125_at<br>1442654_at   | A530054K11Rik                                        | RIKEN cDNA A530054K11 gene                                                                                          | DOWN |
| 1441573_at                 | Scmh1                                                | Sex comb on midleg homolog 1                                                                                        | DOWN |
| 1443020_at                 | Hmbox1                                               | homeobox containing 1                                                                                               | DOWN |
| 1444092_at                 | 9430025M13Rik                                        | RIKEN cDNA 9430025M13 gene                                                                                          | DOWN |
| 1448229_s_at               | Ccnd2                                                | cyclin D2                                                                                                           | DOWN |
| 1449490_at                 | Mbd4                                                 | methyl-CpG binding domain protein 4                                                                                 | DOWN |
| 1449578_at                 | Supt16h                                              | suppressor of Ty 16 homolog (S. cerevisiae)                                                                         | DOWN |
| 1455246_at                 | Smarcc1                                              | SWI/SNF related, matrix associated, actin dependent regulator of chromatin, subfamily c, member 1                   | DOWN |
| 1458240_at                 | Magi1                                                | Membrane associated guanylate kinase, WW and PDZ domain containing 1                                                | DOWN |
| 1459250_at                 | Tshz2                                                | teashirt zinc finger family member 2                                                                                | DOWN |
| 1459372_at                 | Npas4                                                | neuronal PAS domain protein 4                                                                                       | DOWN |
| 1423477_at                 | LOC100044533 ///<br>Zic1                             | similar to Zic protein /// zinc finger protein of the cerebellum 1                                                  | UP   |
| 1424784_at                 | OTTMUSG00000010<br>657                               | predicted gene, OTTMUSG00000010657                                                                                  | UP   |
| 1426906_at<br>1452231_x_at | Ifi203                                               | interferon activated gene 203                                                                                       | UP   |
| 1429308_at                 | Prdm16                                               | PR domain containing 16                                                                                             | UP   |
| 1429951_at                 | Ssbp2                                                | single-stranded DNA binding protein 2                                                                               | UP   |
| 1430811_a_at               | Nuf2                                                 | NUF2, NDC80 kinetochore complex component, homolog (S. cerevisiae)                                                  | UP   |
| 1431057_a_at               | Prss23                                               | protease, serine, 23                                                                                                | UP   |
| 1434171_at                 | C330011K17Rik                                        | RIKEN cDNA C330011K17 gene                                                                                          | UP   |
| 1436994_a_at               | Hist1h1c                                             | histone cluster 1, H1c                                                                                              | UP   |
| 1437579_at                 | Nek2                                                 | NIMA (never in mitosis gene a)-related expressed kinase 2                                                           | UP   |
| 1437904_at                 | Rbm45                                                | RNA binding motif protein 45                                                                                        | UP   |
| 1439627_at                 | Zic1                                                 | zinc finger protein of the cerebellum 1                                                                             | UP   |
| 1448406_at                 | Eid1                                                 | EP300 interacting inhibitor of differentiation 1                                                                    | UP   |
| 1455657_at                 | 2610207I05Rik                                        | RIKEN cDNA 2610207I05 gene                                                                                          | UP   |
| <b>Category: cytoplasm</b> |                                                      |                                                                                                                     |      |
| 1418701_at                 | Comt1                                                | catechol-O-methyltransferase 1                                                                                      | DOWN |
| 1418726_a_at               | Tnnt2                                                | troponin T2, cardiac                                                                                                | DOWN |
| 1431182_at                 | EG666031 /// Hspa8<br>/// LOC624853 ///<br>LOC641192 | predicted gene, EG666031 /// heat shock protein 8 /// hypothetical<br>LOC624853 /// similar to heat shock protein 8 | DOWN |
| 1440142_s_at               | Gfap                                                 | glial fibrillary acidic protein                                                                                     | DOWN |
| 1449154_at                 | Col11a1                                              | collagen, type XI, alpha 1                                                                                          | DOWN |
| 1453994_at                 | C230094A16Rik                                        | RIKEN cDNA C230094A16 gene                                                                                          | DOWN |
| 1455136_at                 | Atp1a2                                               | ATPase, Na <sup>+</sup> transporting, alpha 2 polypeptide                                                           | DOWN |
| 1455342_at                 | A230083H22Rik                                        | RIKEN cDNA A230083H22 gene                                                                                          | DOWN |
| 1417461_at<br>1417462_at   | Cap1                                                 | CAP, adenylate cyclase-associated protein 1 (yeast)                                                                 | UP   |

|                                                        |                                         |                                                                                                                                                                         |      |
|--------------------------------------------------------|-----------------------------------------|-------------------------------------------------------------------------------------------------------------------------------------------------------------------------|------|
| 1418493_a_at<br>1436853_a_at                           | Snca                                    | synuclein, alpha                                                                                                                                                        | UP   |
| 1425521_at                                             | Paip1                                   | polyadenylate binding protein-interacting protein 1                                                                                                                     | UP   |
| 1427883_a_at                                           | Col3a1                                  | collagen, type III, alpha 1                                                                                                                                             | UP   |
| 1430979_a_at                                           | Prdx2                                   | peroxiredoxin 2                                                                                                                                                         | UP   |
| 1441955_s_at                                           | LOC676674 /// Paip1                     | similar to poly(A) binding protein interacting protein 1 /// polyadenylate binding protein-interacting protein 1                                                        | UP   |
| 1446144_at                                             | Pex5l                                   | peroxisomal biogenesis factor 5-like                                                                                                                                    | UP   |
| 1450779_at                                             | Fabp7                                   | fatty acid binding protein 7, brain                                                                                                                                     | UP   |
| <b>Category: plasma membrane</b>                       |                                         |                                                                                                                                                                         |      |
| 1421738_at                                             | Gabra2 ///<br>LOC100047443              | gamma-aminobutyric acid (GABA-A) receptor, subunit alpha 2 /// similar to Gamma-aminobutyric-acid receptor subunit alpha-2 precursor (GABA(A) receptor subunit alpha-2) | DOWN |
| 1436239_at                                             | Slc5a5                                  | solute carrier family 5 (sodium iodide symporter), member 5                                                                                                             | DOWN |
| 1439987_at                                             | Grik1                                   | glutamate receptor, ionotropic, kainate 1                                                                                                                               | DOWN |
| 1443865_at<br>1455444_at                               | Gabra2                                  | gamma-aminobutyric acid (GABA-A) receptor, subunit alpha 2                                                                                                              | DOWN |
| 1448788_at                                             | Cd200                                   | CD200 antigen                                                                                                                                                           | DOWN |
| 1454770_at                                             | Cckbr                                   | cholecystokinin B receptor                                                                                                                                              | DOWN |
| 1415904_at<br>1431056_a_at                             | Lpl                                     | lipoprotein lipase                                                                                                                                                      | UP   |
| 1417839_at                                             | Cldn5                                   | claudin 5                                                                                                                                                               | UP   |
| 1418898_at<br>1423322_at<br>1449262_s_at<br>1450937_at | Lin7c                                   | lin-7 homolog C (C. elegans)                                                                                                                                            | UP   |
| <b>Category: mitochondrion</b>                         |                                         |                                                                                                                                                                         |      |
| 1431406_at                                             | Agxt2l1                                 | alanine-glyoxylate aminotransferase 2-like 1                                                                                                                            | DOWN |
| 1439197_at                                             | Pi4kb                                   | phosphatidylinositol 4-kinase, catalytic, beta polypeptide                                                                                                              | DOWN |
| 1426387_x_at<br>1436944_x_at                           | 4933439C20Rik ///<br>LOC236604 /// Pisd | RIKEN cDNA 4933439C20 gene /// phosphatidylserine decarboxylase pseudogene /// phosphatidylserine decarboxylase                                                         | UP   |
| 1431006_at                                             | Mrpl3                                   | mitochondrial ribosomal protein L3                                                                                                                                      | UP   |
| 1431241_at                                             | Chchd3 ///<br>LOC100046321              | coiled-coil-helix-coiled-coil-helix domain containing 3 /// similar to coiled-coil-helix-coiled-coil-helix domain containing 3                                          | UP   |
| <b>Category: cytoskeleton</b>                          |                                         |                                                                                                                                                                         |      |
| 1421090_at                                             | Epb4.111                                | erythrocyte protein band 4.1-like 1                                                                                                                                     | DOWN |
| 1435551_at                                             | Fhod3                                   | formin homology 2 domain containing 3                                                                                                                                   | DOWN |
| 1450208_a_at                                           | Elmo1                                   | engulfment and cell motility 1, ced-12 homolog (C. elegans)                                                                                                             | DOWN |
| 1455708_at                                             | Tmod3                                   | Tropomodulin 3                                                                                                                                                          | DOWN |
| 1420863_at<br>1458541_at                               | Dctn4                                   | dynactin 4                                                                                                                                                              | UP   |
| <b>Category: extracellular region</b>                  |                                         |                                                                                                                                                                         |      |
| 1423286_at<br>1423287_at                               | Cbln1 ///<br>LOC100046314               | cerebellin 1 precursor protein /// similar to precerebellin-1                                                                                                           | DOWN |
| 1433607_at                                             | Cbln4                                   | cerebellin 4 precursor protein                                                                                                                                          | DOWN |
| 1434993_at                                             | B830045N13Rik                           | RIKEN cDNA B830045N13 gene                                                                                                                                              | DOWN |
| 1434719_at                                             | A2m /// LOC677369                       | alpha-2-macroglobulin /// hypothetical protein LOC677369                                                                                                                | UP   |
| <b>Category: endoplasmic reticulum</b>                 |                                         |                                                                                                                                                                         |      |

|                                      |                                                                                                                                                                        |                                                                                                                                                                                                                                                                                                                                                                   |      |
|--------------------------------------|------------------------------------------------------------------------------------------------------------------------------------------------------------------------|-------------------------------------------------------------------------------------------------------------------------------------------------------------------------------------------------------------------------------------------------------------------------------------------------------------------------------------------------------------------|------|
| 1416507_at                           | Cnpy2                                                                                                                                                                  | canopy 2 homolog (zebrafish)                                                                                                                                                                                                                                                                                                                                      | DOWN |
| 1438435_at                           | Phca                                                                                                                                                                   | phytoceramidase, alkaline                                                                                                                                                                                                                                                                                                                                         | DOWN |
| 1444037_at                           | Lman1                                                                                                                                                                  | lectin, mannose-binding, 1                                                                                                                                                                                                                                                                                                                                        | DOWN |
| 1449859_at                           | Golt1b                                                                                                                                                                 | golgi transport 1 homolog B (S. cerevisiae)                                                                                                                                                                                                                                                                                                                       | DOWN |
| <b>Category: extracellular space</b> |                                                                                                                                                                        |                                                                                                                                                                                                                                                                                                                                                                   |      |
| 1417765_a_at                         | Amy1                                                                                                                                                                   | amylase 1, salivary                                                                                                                                                                                                                                                                                                                                               | DOWN |
| 1419426_s_at                         | 100038965 /// Ccl21a<br>/// Ccl21b /// Ccl21c ///<br>ENSMUSG000000073<br>869 ///<br>LOC100041504 ///<br>LOC100041593 ///<br>LOC100042493 ///<br>OTTMUSG00000011<br>350 | predicted gene, 100038965 /// chemokine (C-C motif) ligand 21a ///<br>chemokine (C-C motif) ligand 21b /// chemokine (C-C motif) ligand 21c<br>(leucine) /// predicted gene, ENSMUSG00000073869 /// similar to beta<br>chemokine Exodus-2 /// similar to beta chemokine Exodus-2 /// similar to beta<br>chemokine Exodus-2 /// predicted gene, OTTMUSG00000011350 | DOWN |
| 1417638_at                           | Lefty1                                                                                                                                                                 | left right determination factor 1                                                                                                                                                                                                                                                                                                                                 | UP   |
| <b>Category: intracellular</b>       |                                                                                                                                                                        |                                                                                                                                                                                                                                                                                                                                                                   |      |
| 1449491_at                           | Card10                                                                                                                                                                 | caspase recruitment domain family, member 10                                                                                                                                                                                                                                                                                                                      | DOWN |
| 1456257_at                           | D1ErtD53e                                                                                                                                                              | DNA segment, Chr 1, ERATO Doi 53, expressed                                                                                                                                                                                                                                                                                                                       | DOWN |
| 1456518_at                           | 4930422I07Rik                                                                                                                                                          | RIKEN cDNA 4930422I07 gene                                                                                                                                                                                                                                                                                                                                        | DOWN |
| <b>Category: cytosol</b>             |                                                                                                                                                                        |                                                                                                                                                                                                                                                                                                                                                                   |      |
| 1421385_a_at                         | Myo7a                                                                                                                                                                  | myosin VIIa                                                                                                                                                                                                                                                                                                                                                       | DOWN |
| 1447831_s_at                         | Mtmr7                                                                                                                                                                  | myotubularin related protein 7                                                                                                                                                                                                                                                                                                                                    | DOWN |
| 1436991_x_at<br>1437171_x_at         | Gsn                                                                                                                                                                    | gelsolin                                                                                                                                                                                                                                                                                                                                                          | UP   |
| <b>Category: other</b>               |                                                                                                                                                                        |                                                                                                                                                                                                                                                                                                                                                                   |      |
| 1416953_at                           | Ctgf                                                                                                                                                                   | connective tissue growth factor                                                                                                                                                                                                                                                                                                                                   | DOWN |
| 1430485_at                           | Trpc2                                                                                                                                                                  | transient receptor potential cation channel, subfamily C, member 2                                                                                                                                                                                                                                                                                                | DOWN |
| 1439650_at                           | Rtn4                                                                                                                                                                   | reticulon 4                                                                                                                                                                                                                                                                                                                                                       | DOWN |
| 1418687_at                           | Arc                                                                                                                                                                    | activity regulated cytoskeletal-associated protein                                                                                                                                                                                                                                                                                                                | DOWN |
| 1456685_at                           | Nsg2                                                                                                                                                                   | neuron specific gene family member 2                                                                                                                                                                                                                                                                                                                              | DOWN |
| 1458203_at                           | Spire1                                                                                                                                                                 | Spire homolog 1 (Drosophila)                                                                                                                                                                                                                                                                                                                                      | DOWN |
| 1455600_at                           | Rps3                                                                                                                                                                   | ribosomal protein S3                                                                                                                                                                                                                                                                                                                                              | DOWN |
| 1449421_a_at                         | Kcne2                                                                                                                                                                  | potassium voltage-gated channel, Isk-related subfamily, gene 2                                                                                                                                                                                                                                                                                                    | DOWN |
| 1455965_at                           | Adamts4                                                                                                                                                                | a disintegrin-like and metalloproteinase (reprolysin type) with thrombospondin<br>type 1 motif, 4                                                                                                                                                                                                                                                                 | UP   |
| 1442742_at                           | Atp2c1                                                                                                                                                                 | ATPase, Casequestering                                                                                                                                                                                                                                                                                                                                            | UP   |
| 1434624_x_at                         | Rps9                                                                                                                                                                   | ribosomal protein S9                                                                                                                                                                                                                                                                                                                                              | UP   |
| 1438936_s_at<br>1438937_x_at         | Ang                                                                                                                                                                    | angiogenin, ribonuclease, RNase A family, 5                                                                                                                                                                                                                                                                                                                       | UP   |
| 1421144_at                           | Rpgrip1                                                                                                                                                                | retinitis pigmentosa GTPase regulator interacting protein 1                                                                                                                                                                                                                                                                                                       | UP   |

**Table S6** Genes whose expression levels are modified in transgenic compared to wild type hippocampus. Clustering according to Gene Ontology (Molecular function)

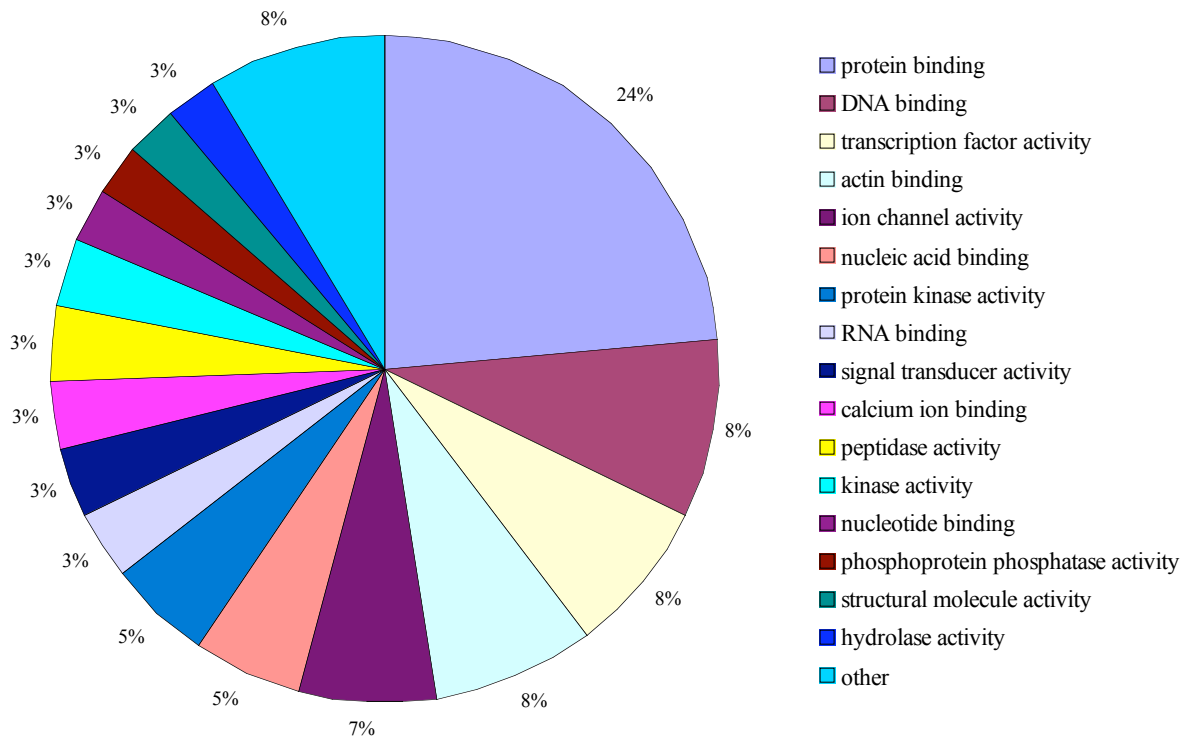

| Probe Set ID                     | Gen Symbol                | Gene Name                                                     | Change |
|----------------------------------|---------------------------|---------------------------------------------------------------|--------|
| <b>Category: protein binding</b> |                           |                                                               |        |
| 1416200_at                       | Il33                      | interleukin 33                                                | DOWN   |
| 1416250_at<br>1448272_at         | Btg2                      | B-cell translocation gene 2, anti-proliferative               | DOWN   |
| 1416507_at                       | Cnpy2                     | canopy 2 homolog (zebrafish)                                  | DOWN   |
| 1416953_at                       | Ctgf                      | connective tissue growth factor                               | DOWN   |
| 1418701_at                       | Comt1                     | catechol-O-methyltransferase 1                                | DOWN   |
| 1423129_at<br>1425845_a_at       | Shoc2                     | soc-2 (suppressor of clear) homolog (C. elegans)              | DOWN   |
| 1423286_at<br>1423287_at         | Cbln1 ///<br>LOC100046314 | cerebellin 1 precursor protein /// similar to precerebellin-1 | DOWN   |
| 1439650_at                       | Rtn4                      | reticulon 4                                                   | DOWN   |
| 1440142_s_at                     | Gfap                      | glial fibrillary acidic protein                               | DOWN   |
| 1441573_at                       | Scmh1                     | Sex comb on midleg homolog 1                                  | DOWN   |
| 1441684_at                       | Ttc3                      | tetratricopeptide repeat domain 3                             | DOWN   |
| 1448229_s_at                     | Ccnd2                     | cyclin D2                                                     | DOWN   |



|                                                        |                                       |                                                                                                                  |      |
|--------------------------------------------------------|---------------------------------------|------------------------------------------------------------------------------------------------------------------|------|
| 1448788_at                                             | Cd200                                 | CD200 antigen                                                                                                    | DOWN |
| 1449030_at                                             | Syn2                                  | synapsin II                                                                                                      | DOWN |
| 1449491_at                                             | Card10                                | caspase recruitment domain family, member 10                                                                     | DOWN |
| 1450208_a_at                                           | Elmo1                                 | engulfment and cell motility 1, ced-12 homolog (C. elegans)                                                      | DOWN |
| 1457751_at                                             | 4832420A03Rik<br>/// Rsf1             | RIKEN cDNA 4832420A03 gene /// remodeling and spacing factor 1                                                   | DOWN |
| 1417839_at                                             | Cldn5                                 | claudin 5                                                                                                        | UP   |
| 1418898_at<br>1423322_at<br>1449262_s_at<br>1450937_at | Lin7c                                 | lin-7 homolog C (C. elegans)                                                                                     | UP   |
| 1420863_at<br>1458541_at                               | Dctn4                                 | dynactin 4                                                                                                       | UP   |
| 1421144_at                                             | Rpgrip1                               | retinitis pigmentosa GTPase regulator interacting protein 1                                                      | UP   |
| 1425521_at                                             | Paip1                                 | polyadenylate binding protein-interacting protein 1                                                              | UP   |
| 1426906_at<br>1452231_x_at                             | Ifi203                                | interferon activated gene 203                                                                                    | UP   |
| 1429244_at                                             | 1500011B03Rik<br>///<br>2610524H06Rik | RIKEN cDNA 1500011B03 gene /// RIKEN cDNA 2610524H06 gene                                                        | UP   |
| 1434719_at                                             | A2m ///<br>LOC677369                  | alpha-2-macroglobulin /// hypothetical protein LOC677369                                                         | UP   |
| 1441955_s_at                                           | LOC676674 ///<br>Paip1                | similar to poly(A) binding protein interacting protein 1 /// polyadenylate binding protein-interacting protein 1 | UP   |
| 1446144_at                                             | Pex5l                                 | peroxisomal biogenesis factor 5-like                                                                             | UP   |
| 1448406_at                                             | Eid1                                  | EP300 interacting inhibitor of differentiation 1                                                                 | UP   |
| <b>Category: DNA binding</b>                           |                                       |                                                                                                                  |      |
| 1419380_at                                             | Zfp423                                | zinc finger protein 423                                                                                          | DOWN |
| 1428417_at<br>1428418_s_at                             | 3110050N22Rik                         | RIKEN cDNA 3110050N22 gene                                                                                       | DOWN |
| 1449490_at                                             | Mbd4                                  | methyl-CpG binding domain protein 4                                                                              | DOWN |
| 1455246_at                                             | Smarcc1                               | SWI/SNF related, matrix associated, actin dependent regulator of chromatin, subfamily c, member 1                | DOWN |
| 1459372_at                                             | Npas4                                 | neuronal PAS domain protein 4                                                                                    | DOWN |
| 1423477_at                                             | LOC100044533<br>/// Zic1              | similar to Zic protein /// zinc finger protein of the cerebellum 1                                               | UP   |
| 1429951_at                                             | Ssbp2                                 | single-stranded DNA binding protein 2                                                                            | UP   |
| 1431213_a_at<br>1431214_at                             | LOC433762                             | hypothetical gene LOC433762                                                                                      | UP   |
| 1436994_a_at                                           | Hist1h1c                              | histone cluster 1, H1c                                                                                           | UP   |
| 1439627_at                                             | Zic1                                  | zinc finger protein of the cerebellum 1                                                                          | UP   |
| <b>Category: transcription factor activity</b>         |                                       |                                                                                                                  |      |
| 1415899_at                                             | Junb                                  | Jun-B oncogene                                                                                                   | DOWN |
| 1416505_at                                             | Nr4a1                                 | nuclear receptor subfamily 4, group A, member 1                                                                  | DOWN |

|                                       |                            |                                                                                                                                                                         |      |
|---------------------------------------|----------------------------|-------------------------------------------------------------------------------------------------------------------------------------------------------------------------|------|
| 1418174_at<br>1438211_s_at            | Dbp                        | D site albumin promoter binding protein                                                                                                                                 | DOWN |
| 1421028_a_at<br>1451507_at            | Mef2c                      | myocyte enhancer factor 2C                                                                                                                                              | DOWN |
| 1421163_a_at                          | Nfia                       | nuclear factor I/A                                                                                                                                                      | DOWN |
| 1423100_at                            | Fos                        | FBJ osteosarcoma oncogene                                                                                                                                               | DOWN |
| 1427682_a_at                          | Egr2                       | early growth response 2                                                                                                                                                 | DOWN |
| 1443020_at                            | Hmbox1                     | homeobox containing 1                                                                                                                                                   | DOWN |
| 1459250_at                            | Tshz2                      | teashirt zinc finger family member 2                                                                                                                                    | DOWN |
| <b>Category: actin binding</b>        |                            |                                                                                                                                                                         |      |
| 1418687_at                            | Arc                        | activity regulated cytoskeletal-associated protein                                                                                                                      | DOWN |
| 1421090_at                            | Epb4.111                   | erythrocyte protein band 4.1-like 1                                                                                                                                     | DOWN |
| 1435551_at                            | Fhod3                      | formin homology 2 domain containing 3                                                                                                                                   | DOWN |
| 1439397_at                            | Fmn1                       | formin 1                                                                                                                                                                | DOWN |
| 1455708_at                            | Tmod3                      | Tropomodulin 3                                                                                                                                                          | DOWN |
| 1458203_at                            | Spire1                     | Spire homolog 1 (Drosophila)                                                                                                                                            | DOWN |
| 1417461_at<br>1417462_at              | Cap1                       | CAP, adenylate cyclase-associated protein 1 (yeast)                                                                                                                     | UP   |
| 1436991_x_at<br>1437171_x_at          | Gsn                        | gelsolin                                                                                                                                                                | UP   |
| 1438936_s_at<br>1438937_x_at          | Ang                        | angiogenin, ribonuclease, RNase A family, 5                                                                                                                             | UP   |
| <b>Category: ion channel activity</b> |                            |                                                                                                                                                                         |      |
| 1421738_at                            | Gabra2 ///<br>LOC100047443 | gamma-aminobutyric acid (GABA-A) receptor, subunit alpha 2 /// similar to Gamma-aminobutyric-acid receptor subunit alpha-2 precursor (GABA(A) receptor subunit alpha-2) | DOWN |
| 1430485_at                            | Trpc2                      | transient receptor potential cation channel, subfamily C, member 2                                                                                                      | DOWN |
| 1439987_at                            | Grik1                      | glutamate receptor, ionotropic, kainate 1                                                                                                                               | DOWN |
| 1443865_at<br>1455444_at              | Gabra2                     | gamma-aminobutyric acid (GABA-A) receptor, subunit alpha 2                                                                                                              | DOWN |
| 1449421_a_at                          | Kcne2                      | potassium voltage-gated channel, Isk-related subfamily, gene 2                                                                                                          | DOWN |
| 1450712_at                            | Kcnj9                      | potassium inwardly-rectifying channel, subfamily J, member 9                                                                                                            | DOWN |
| 1440397_at                            | Cacna2d1                   | calcium channel, voltage-dependent, alpha2/delta subunit 1                                                                                                              | UP   |
| 1456923_at                            | Trpm3                      | transient receptor potential cation channel, subfamily M, member 3                                                                                                      | UP   |
| <b>Category: nucleic acid binding</b> |                            |                                                                                                                                                                         |      |
| 1440125_at<br>1442654_at              | A530054K11Rik              | RIKEN cDNA A530054K11 gene                                                                                                                                              | DOWN |
| 1444092_at                            | 9430025M13Rik              | RIKEN cDNA 9430025M13 gene                                                                                                                                              | DOWN |
| 1456518_at                            | 4930422I07Rik              | RIKEN cDNA 4930422I07 gene                                                                                                                                              | DOWN |
| 1424784_at                            | OTTMUSG0000<br>0010657     | predicted gene, OTTMUSG00000010657                                                                                                                                      | UP   |
| 1429308_at                            | Prdm16                     | PR domain containing 16                                                                                                                                                 | UP   |

|                                             |               |                                                                                               |      |
|---------------------------------------------|---------------|-----------------------------------------------------------------------------------------------|------|
| 1434171_at                                  | C330011K17Rik | RIKEN cDNA C330011K17 gene                                                                    | UP   |
| <b>Category: protein kinase activity</b>    |               |                                                                                               |      |
| 1422659_at<br>1427763_a_at                  | Camk2d        | calcium/calmodulin-dependent protein kinase II, delta                                         | DOWN |
| 1429463_at                                  | Prkaa2        | protein kinase, AMP-activated, alpha 2 catalytic subunit                                      | DOWN |
| 1435162_at                                  | Prkg2         | protein kinase, cGMP-dependent, type II                                                       | DOWN |
| 1439843_at<br>1441974_at                    | Camk4         | calcium/calmodulin-dependent protein kinase IV                                                | DOWN |
| 1440801_s_at                                | Adrbk2        | adrenergic receptor kinase, beta 2                                                            | DOWN |
| 1437579_at                                  | Nek2          | NIMA (never in mitosis gene a)-related expressed kinase 2                                     | UP   |
| <b>Category: RNA binding</b>                |               |                                                                                               |      |
| 1431708_a_at                                | Tia1          | cytotoxic granule-associated RNA binding protein 1                                            | DOWN |
| 1455600_at                                  | Rps3          | ribosomal protein S3                                                                          | DOWN |
| 1434624_x_at                                | Rps9          | ribosomal protein S9                                                                          | UP   |
| 1437904_at                                  | Rbm45         | RNA binding motif protein 45                                                                  | UP   |
| <b>Category: signal transducer activity</b> |               |                                                                                               |      |
| 1417432_a_at<br>1454696_at                  | Gnb1          | guanine nucleotide binding protein (G protein), beta 1                                        | DOWN |
| 1421087_at                                  | Per3          | period homolog 3 (Drosophila)                                                                 | DOWN |
| 1449859_at                                  | Golt1b        | golgi transport 1 homolog B (S. cerevisiae)                                                   | DOWN |
| 1420940_x_at<br>1420942_s_at                | Rgs5          | regulator of G-protein signaling 5                                                            | UP   |
| <b>Category: calcium ion binding</b>        |               |                                                                                               |      |
| 1417765_a_at                                | Amy1          | amylase 1, salivary                                                                           | DOWN |
| 1435400_at                                  | 2900075B16Rik | RIKEN cDNA 2900075B16 gene                                                                    | DOWN |
| 1420429_at                                  | Pcdhb3        | protocadherin beta 3                                                                          | UP   |
| 1442742_at                                  | Atp2c1        | ATPase, Casequestering                                                                        | UP   |
| <b>Category: peptidase activity</b>         |               |                                                                                               |      |
| 1437537_at                                  | Casp9         | caspase 9                                                                                     | DOWN |
| 1440413_at                                  | A830006F12Rik | RIKEN cDNA A830006F12 gene                                                                    | DOWN |
| 1431057_a_at                                | Prss23        | protease, serine, 23                                                                          | UP   |
| 1455965_at                                  | Adamts4       | a disintegrin-like and metallopeptidase (reprolysin type) with thrombospondin type 1 motif, 4 | UP   |
| <b>Category: kinase activity</b>            |               |                                                                                               |      |
| 1439197_at                                  | Pi4kb         | phosphatidylinositol 4-kinase, catalytic, beta polypeptide                                    | DOWN |
| 1458240_at                                  | Magi1         | Membrane associated guanylate kinase, WW and PDZ domain containing 1                          | DOWN |
| 1439740_s_at                                | Uck2          | uridine-cytidine kinase 2                                                                     | UP   |
| 1455657_at                                  | 2610207I05Rik | RIKEN cDNA 2610207I05 gene                                                                    | UP   |

| <b>Category: nucleotide binding</b>                  |                                                         |                                                                                                                  |      |
|------------------------------------------------------|---------------------------------------------------------|------------------------------------------------------------------------------------------------------------------|------|
| 1431182_at                                           | EG666031 ///<br>Hspa8 ///<br>LOC624853 ///<br>LOC641192 | predicted gene, EG666031 /// heat shock protein 8 /// hypothetical LOC624853 /// similar to heat shock protein 8 | DOWN |
| 1454772_at                                           | Ascc3l1                                                 | Activating signal cointegrator 1 complex subunit 3-like 1                                                        | DOWN |
| 1455136_at                                           | Atp1a2                                                  | ATPase, Na <sup>+</sup> transporting, alpha 2 polypeptide                                                        | DOWN |
| <b>Category: phosphoprotein phosphatase activity</b> |                                                         |                                                                                                                  |      |
| 1447831_s_at                                         | Mtmr7                                                   | myotubularin related protein 7                                                                                   | DOWN |
| 1448830_at                                           | Dusp1                                                   | dual specificity phosphatase 1                                                                                   | DOWN |
| 1429691_at                                           | Ptprg                                                   | protein tyrosine phosphatase, receptor type, G                                                                   | UP   |
| <b>Category: structural molecule activity</b>        |                                                         |                                                                                                                  |      |
| 1419230_at<br>1419231_s_at                           | Krt12                                                   | keratin 12                                                                                                       | DOWN |
| 1449154_at                                           | Col11a1                                                 | collagen, type XI, alpha 1                                                                                       | DOWN |
| 1427883_a_at                                         | Col3a1                                                  | collagen, type III, alpha 1                                                                                      | UP   |
| <b>Category: hydrolase activity</b>                  |                                                         |                                                                                                                  |      |
| 1438435_at                                           | Phca                                                    | phytoceramidase, alkaline                                                                                        | DOWN |
| 1415904_at<br>1431056_a_at                           | Lpl                                                     | lipoprotein lipase                                                                                               | UP   |
| 1418148_at                                           | Abhd1                                                   | abhydrolase domain containing 1                                                                                  | UP   |
| <b>Category: other</b>                               |                                                         |                                                                                                                  |      |
| 1423760_at<br>1434376_at                             | Cd44                                                    | CD44 antigen                                                                                                     | DOWN |
| 1454770_at                                           | Cckbr                                                   | cholecystokinin B receptor                                                                                       | DOWN |
| 1425029_a_at                                         | Mboat2                                                  | membrane bound O-acyltransferase domain containing 2                                                             | DOWN |
| 1431406_at                                           | Agxt2l1                                                 | alanine-glyoxylate aminotransferase 2-like 1                                                                     | DOWN |
| 1421385_a_at                                         | Myo7a                                                   | myosin VIIa                                                                                                      | DOWN |
| 1424877_a_at                                         | Alad ///<br>LOC100046072                                | aminolevulinatase, delta-, dehydratase /// similar to aminolevulinatase, delta-, dehydratase                     | DOWN |
| 1436239_at                                           | Slc5a5                                                  | solute carrier family 5 (sodium iodide symporter), member 5                                                      | DOWN |
| 1446244_at                                           | Zyg11b                                                  | zyg-II homolog B (C. elegans)                                                                                    | DOWN |
| 1450779_at                                           | Fabp7                                                   | fatty acid binding protein 7, brain                                                                              | UP   |
| 1430979_a_at                                         | Prdx2                                                   | peroxiredoxin 2                                                                                                  | UP   |

**Table S7** Escape latency on odd trials across the acquisition sessions of the reversal learning paradigm

| Session | ANOVA $F_{(1,19)}$ | <i>P</i> value          |
|---------|--------------------|-------------------------|
| 1 odd   | 22.299             | <b><i>P</i> = 0.000</b> |
| 1 even  | 6.853              | <b><i>P</i> = 0.017</b> |
| 2 odd   | 1.681              | <i>P</i> = 0.211        |
| 2 even  | 2.999              | <i>P</i> = 0.100        |
| 3 odd   | 5.398              | <b><i>P</i> = 0.032</b> |
| 3 even  | 20.266             | <b><i>P</i> = 0.000</b> |
| 4 odd   | 7.630              | <b><i>P</i> = 0.013</b> |
| 4 even  | 6.137              | <b><i>P</i> = 0.023</b> |
| 5 odd   | 33.608             | <b><i>P</i> = 0.000</b> |
| 5 even  | 14.924             | <b><i>P</i> = 0.001</b> |
| 6 odd   | 13.470             | <b><i>P</i> = 0.002</b> |
| 6 even  | 12.811             | <b><i>P</i> = 0.002</b> |
| 7 odd   | 15.939             | <b><i>P</i> = 0.001</b> |
| 7 even  | 12.914             | <b><i>P</i> = 0.002</b> |
| 8 odd   | 2.242              | <i>P</i> = 0.152        |
| 8 even  | 2.060              | <b><i>P</i> = 0.037</b> |

*P* values correspond to ANOVA  $F_{(1,19)}$

**Table S8** Categorization of activity-dependent genes according to their induction by DREAM derepression and/or the nuclear calcium/calmodulin complex as defined in [1]

(A) DREAM target genes whose activity-dependent induction is independent of the nuclear calcium/calmodulin complex

| ID           | Symb  | tg  | Bicc/Inh | Gene Name                            |
|--------------|-------|-----|----------|--------------------------------------|
| NM_009234    | Sox11 | 4.7 | **/-     | SRY-box containing gene 11           |
| NM_010234    | c-Fos | 4.2 | ***/-    | FBJ osteosarcoma oncogene            |
| NM_010774    | Mbd4  | 3.1 | nc/-     | methyl-CpG binding domain protein 4  |
| NM_080455    | Tshz2 | 2.4 | nc/-     | teashirt zinc finger family member 2 |
| NM_001122952 | Nfia  | 1.9 | nc/-     | nuclear factor I/A                   |
| NM_010118    | Egr2  | 1.8 | ***/-    | early growth response 2              |
| NM_001170537 | Mef2c | 1.8 | nc/-     | myocyte enhancer factor 2C           |
| NM_011067    | Per3  | 1.6 | nc/-     | period homolog 3 (Drosophila)        |

Column headings are as follows: ID, GenBank identification number; Symb, gene symbol; tg, fold repression in DREAM transgenic hippocampus; Bicc/Inh as defined in [1] Bicc/, change in the expression after biccuculine-induced action potential bursting: nc, no change, \*\* between 5 and 10 fold and \*\*\* more than 10-fold; /Inh, percentage of inhibition of the change following blockade of nuclear calcium signaling with CaMBP4: -, inhibition lower than 40%

**(B)** Genes that are induced by both DREAM derepression and the nuclear calcium/calmodulin complex

| ID        | Symb    | tg  | Bicc/Inh | Gene                                               |
|-----------|---------|-----|----------|----------------------------------------------------|
| NM_153553 | Npas4   | 3.3 | ***/**   | neuronal PAS domain protein 4                      |
| NM_026324 | Kirrel3 | 2.8 | */**     | Kin of IRRE like 3 (Drosophila)                    |
| NM_018790 | Arc     | 2.5 | ***/**   | activity regulated cytoskeletal-associated protein |
| NM_013642 | Dusp1   | 2.5 | **/*     | dual specificity phosphatase 1                     |
| NM_010444 | Nr4a1   | 2.1 | ***/*    | nuclear receptor subfamily.4, group A, member 1    |
| NM_007570 | Btg2    | 1.8 | ***/ref  | B-cell translocation gene 2                        |
| NM_008416 | JunB    | 1.8 | ***/**   | Jun B protooncogene                                |
| NM_023324 | Peli1   | 1.8 | */*      | pellino 1                                          |
|           | Gadd45  |     |          | Growth arrest and DNA-damage-inducible 45          |
| NM_008655 | b       | 1.6 | ***/**   | beta                                               |
| NM_011361 | Sgk     | 1.5 | **/*     | Serum- glucocorticoid-inducible kinase             |
| NM_028755 | Arpp21  | 1.5 | */*      | cyclic AMP-regulated phosphoprotein, 21            |
| BM941356  | Pcdh9   | 1.5 | **/**    | Protocadherin 9                                    |
| NM_013613 | Nr4a2   | 1.5 | **/*     | nuclear receptor subfamily.4, group A, member 2    |
| NM_018820 | Sertad1 | 1.5 | **/*     | SERTA domain containing 1                          |

Column headings are as follows: ID, GenBank identification number; Symb, gene symbol; tg, Fold repression in DREAM transgenic hippocampus; Bicc/Inh as defined in [1] Bicc/, change in the expression after biccuculine-induced action potential bursting: \*, change between 2 and 5 fold, \*\* between 5 and 10 fold and \*\*\* more than 10-fold; /Inh, percentage of inhibition of the change following blockade of nuclear calcium signaling with CaMBP4: \*, inhibition between 40 and 60%, \*\* inhibition between 60 and 80%, \*\*\* inhibition greater than 80%

## (C) Activity-dependent genes whose induction is not related to DREAM derepression

| ID        | Symb       | tg | Bicc/Inh | Gene                                                                |
|-----------|------------|----|----------|---------------------------------------------------------------------|
| NM_008327 | Ifi202b    | nc | ***/**   | interferon activated gene 202B                                      |
| NM_008380 | Inhba      | nc | ***/**   | inhibin beta-A                                                      |
| NM_011111 | Serpib2    | nc | ***/**   | serine (or cysteine) peptidase inhibitor, clade B, member 2         |
| NM_025413 | Lce1g      | nc | ***/**   | late cornified envelope 1G                                          |
| NM_011982 | Homer      | nc | ***/**   | homer homolog 1 (Drosophila)                                        |
| NM_011198 | Ptgs2      | nc | ***/**   | prostaglandin-endoperoxide synthase 2                               |
| NM_007498 | Atf3       | nc | ***/**   | activating transcription factor 3                                   |
| NM_008842 | Pim1       | nc | ***/**   | proviral integration site 1                                         |
| NM_008013 | Fgl2       | nc | **/**    | fibrinogen-like protein 2                                           |
| BE691546  | C030046G05 | nc | **/**    |                                                                     |
| BE956940  | Lonrf3     | nc | **/**    | LON peptidase N-terminal domain and ring finger 3                   |
| M13227    | Penk       | nc | **/**    | proenkephalin                                                       |
| NM_010207 | Fgfr2      | nc | **/**    | fibroblast growth factor receptor 2                                 |
| NM_028760 | Cep55      | nc | **/**    | centrosomal protein 55                                              |
| NM_029667 | Lce1i      | nc | **/**    | late cornified envelope 1I                                          |
| NM_172576 | Baz1a      | nc | **/**    | bromodomain adjacent to zinc finger domain 1A                       |
| AK004371  | Ras11a     | nc | **/**    | RAS-like, family 11, member A                                       |
| AW555393  | Mest       | nc | **/**    | mesoderm specific transcript                                        |
| BE687858  | BC023892   | nc | **/**    |                                                                     |
| NM_008872 | Plat       | nc | **/**    | plasminogen activator, tissue                                       |
| NM_008987 | Ptx3       | nc | **/**    | pentraxin related gene                                              |
| NM_009044 | Rel        | nc | **/**    | reticuloendotheliosis oncogene                                      |
|           |            | nc |          | solute carrier family 2 (facilitated glucose transporter), member 3 |
| NM_010193 | Slc2a3     |    | **/**    |                                                                     |
| NM_021788 | Sap30      | nc | **/**    | sin3 associated polypeptide                                         |
| NM_027559 | BC063749   | nc | **/**    |                                                                     |
| NM_029466 | Arl5b      | nc | **/**    | ADP-ribosylation factor-like 5B                                     |
| NM_133753 | Errfi1     | nc | **/**    | ERBB receptor feedback inhibitor 1                                  |
| BM941356  | Fbxo33     | nc | **/**    | F-box protein 33                                                    |
| NM_017373 | Nfil3      | nc | **/**    | nuclear factor, interleukin 3, regulated                            |
| NM_144549 | Trib1      | nc | **/**    | tribbles homolog 1 (Drosophila)                                     |
| NM_145463 | Tmem46     | nc | **/**    | transmembrane protein 46                                            |
| NM_153287 | Axud1      | nc | **/**    | AXIN1 up-regulated 1                                                |

Column headings are as follows: ID, GenBank identification number; Symb, gene symbol; tg, nc, no change in DREAM transgenic hippocampus as compared to wild type; Bicc/Inh as defined in [1] Bicc/, change in the expression after bicuculine-induced action potential bursting: \*\* change between 5 and 10 fold and \*\*\* more than 10-fold; /Inh, percentage of inhibition of the change following blockade of nuclear calcium signaling with CaMBP4: \*, inhibition between 40 and 60%, \*\* inhibition between 60 and 80%, \*\*\* inhibition greater than 80%

## Reference

1. Zhang SJ, Zou M, Lu L, Lau D, Ditzel DA, Delucinge-Vivier C, Aso Y, Descombes P, Bading H (2009) Nuclear calcium signaling controls expression of a large gene pool: identification of a gene program for acquired neuroprotection induced by synaptic activity. *PLoS Genet* 5 (8):e1000604
